1 **IMMUNE SYSTEM CHALLENGE IMPROVES COGNITIVE-BEHAVIOURAL RESPONSES**  
2 **AND REVERSES MALARIA-INDUCED COGNITIVE IMPAIRMENT IN MICE**

3  
4 *Luciana Pereira de Sousa Vieira<sup>1#</sup>, Flávia Lima Ribeiro-Gomes<sup>1#</sup>, Roberto Farina de*  
5 *Almeida<sup>2+</sup>, Tadeu Mello e Souza<sup>2</sup>, Guilherme Loureiro Werneck<sup>3</sup>, Diogo Onofre*  
6 *Gomes de Souza<sup>2</sup> & Cláudio Tadeu Daniel-Ribeiro<sup>1\*</sup>*

7  
8 <sup>1</sup>*Laboratório de Pesquisa em Malária, Instituto Oswaldo Cruz & Centro de Pesquisa,*  
9 *Diagnóstico e Treinamento em Malária (CPD-Mal) of Fundação Oswaldo Cruz*  
10 *(Fiocruz) and of Secretaria de Vigilância em Saúde (SVS), Ministério da Saúde;*  
11 <sup>2</sup>*Departamento de Bioquímica, Universidade Federal do Rio Grande do Sul; and*  
12 <sup>3</sup>*Departamento de Epidemiologia of Instituto de Medicina Social, Universidade do*  
13 *Estado do Rio de Janeiro and Instituto de Estudos de Saúde Coletiva da*  
14 *Universidade Federal do Rio de Janeiro, Brazil.*

15  
16 \* Corresponding author at *Laboratório de Pesquisa em Malária, Instituto Oswaldo*  
17 *Cruz, Fiocruz. Av. Brasil 4365, Manguinhos, Rio de Janeiro. CEP 2104-360, RJ Brazil.*  
18 E-mail [malaria@fiocruz.br](mailto:malaria@fiocruz.br).

19 # These authors contributed equally to the work.

20 + Present address: *Programa de Pós-Graduação em Ciências Biológicas, Instituto de*  
21 *Ciências Exatas e Biológicas, Universidade Federal de Ouro Preto, Minas Gerais,*  
22 *Brazil.*

23  
24  
25  
26  
27 **ABSTRACT**

28  
29 Elements of the immune system are necessary for healthy neurocognitive function,  
30 and the pattern of the immune response triggered by different exogenous stimuli may  
31 induce regulatory or deregulatory signals that can affect nervous functions. Here we  
32 investigate the effect of immune stimulation on behavioural parameters in healthy mice  
33 and its impact on cognitive sequelae resulting from non-severe experimental malaria.  
34 We show that the immune modulation induced by a specific combination of immune  
35 stimuli, classically described as capable of inducing a major type 2 immune response,  
36 can improve the long-term memory of healthy adult mice and prevent the negative  
37 cognitive-behavioural impairments caused by a single episode of mild *Plasmodium*  
38 *berghei* ANKA malaria. This finding has implications for the development of  
39 immunogens as cognitive adjuvants.

40  
41  
42 **INTRODUCTION**

43 The immune and nervous systems may be categorized as plastic cognitive systems  
44 due to their ability to recognize real world objects, including microbes, and to their  
45 ability to adapt through experience. Following antigenic or sensory stimulation,  
46 vertebrate organisms undergo changes in the cellular connections of their immune and  
47 nervous systems that alter their abilities and structures. There is considerable evidence  
48 for the existence of strong interactions between these two systems<sup>1-7</sup>.  
49 Immunomodulation of the nervous system can occur through either physiological or

50 pathological mechanisms. The maturation and homeostasis of nervous cognitive  
51 abilities require the participation of components of the immune machinery<sup>6-7</sup>.  
52 Exogenous immune stimuli may also have positive or negative effects on the nervous  
53 system, depending on the nature and intensity of the immune response elicited<sup>1-4,6</sup>.

54 Studies on the effects of immune stimuli on brain function have found evidence for i)  
55 maternal immune stimulation impairing the neurocognitive performance of offspring<sup>8-9</sup>,  
56 ii) both beneficial and harmful effects of neonate vaccination on neuronal plasticity and  
57 cognitive function in adulthood<sup>10</sup>, iii) the damaging impact of systemic inflammatory  
58 stimuli on the cognitive function of adult mice<sup>11-12</sup>, and iv) neurocognitive dysfunction  
59 in both human and experimental models of some infectious diseases<sup>13-27</sup>.

60 Cerebral malaria (CM), the most severe complication of malaria caused by  
61 *Plasmodium falciparum*, can result in neurocognitive sequelae, including motor  
62 deficits, behavioural alterations and severe learning difficulties<sup>15</sup>. Long-term negative  
63 effects are more common in Africa where the prevalence of *falciparum* malaria and CM  
64 is higher<sup>28</sup>. Some of these sequelae are also observed in *Plasmodium berghei* ANKA  
65 (*PbA*) infected C57BL/6 mice, a well-studied model of experimental CM (ECM)<sup>27</sup>. In  
66 recent years, cognitive impairment, mainly related to learning and memory, has also  
67 been reported in residents of endemic regions presenting with non-severe malaria<sup>29-</sup>  
68 <sup>31</sup>. This phenomenon has also been observed in non-severe malaria infections in  
69 mice<sup>32</sup>, in which the ECM model was adapted to assess the neurocognitive alterations  
70 that occur following a short-term episode of non-severe malaria. Using this adapted  
71 model, here we evaluate the effects of immune stimuli on behavioural paradigms such  
72 as memory and anxiety, following a mild malaria episode or during homeostasis.

73 Given the known effect of the immune system on neurocognitive functions, we  
74 hypothesized that immune stimulation may affect cognitive performance. Our results  
75 show a beneficial effect of immune stimulation on cognitive-behavioural parameters in  
76 healthy mice and a reversal of the cognitive impairment caused by malaria parasite  
77 infection.

78

79

## 80 RESULTS

81

### 82 Type 2 immune stimuli improve long-term memory in healthy mice

83 To study the effect of immune stimuli on behavioural paradigms, immunogens were  
84 chosen according to the pattern of immune response induced. Three immune  
85 stimulation strategies were used: T1 and T2 strategies employed well-known antigens  
86 able to induce type 1 and type 2 immune responses, respectively<sup>33-47</sup>, and a “Pool”  
87 strategy was created by the combination of T1 and T2 strategies, described in further  
88 detail in the Material and Methods section. Briefly, mice were infected with *Plasmodium*  
89 *berghei* ANKA, treated from the fourth day after infection on for seven days, and  
90 allowed to rest for thirteen days before being immune stimulated with different  
91 strategies (Fig. 1).

92

93 The effects of immune responses on locomotion and long-term spatial habituation were  
94 assessed via established protocols<sup>32</sup> in mice subjected to two different sessions of the  
95 open field task (OFT), with training (OF1, 10 min.) and test (OF2, 10 min.) sessions 24  
96 hours apart. At the training session, a high rate of locomotor activity is commonly

97 observed. Surprisingly, mice immune stimulated with Pool or T1 strategies showed  
98 reduced total OF1 locomotion when compared to non-immune stimulated mice  
99 (Extended data, Fig. 1a).

100

101 Commonly, after the training session [first OFT (OF1), exposure], exploratory  
102 behaviour decreases as the stress related to novelty disappears, and is usually  
103 significantly lower after 10 minutes of task performance<sup>32,48-49</sup>. Both non-immune  
104 stimulated (Control group) and immune stimulated (Pool, T1 and T2 groups) mice  
105 displayed decreased locomotion in the test session (OF2) compared to the training  
106 session (OF1) (Extended data, Fig. 1a), as expected. These results indicate that  
107 immune stimulation did not affect long-term habituation memory.

108

109 Twenty-four hours later mice were subjected to the novel object recognition test  
110 (NORT) in the same open field arena. During the training session, a similar exploratory  
111 activity of familiar objects (FO1 and FO2) is expected and was observed in all groups  
112 of mice (Control, Pool, T1 and T2) (Fig. 2a; Extended data, Fig. 2a), with a mean  
113 exploration of 25 seconds (data not shown). Remarkably, mice immune stimulated with  
114 the Pool or T2 strategies presented significantly higher recognition memory  
115 performance in relation to the Control group during the test session, performed 24  
116 hours later. Mice submitted to the T1 strategy did not differ from the Control group (Fig.  
117 2c; Extended data Fig. 2c). These data indicate that immune stimulation with  
118 immunogens that induce type 2 immune responses may enhance long-term  
119 recognition memory in healthy mice.

120

### 121 **Immune stimulation of healthy mice did not generate an anxiety-like state**

122 In addition to exploratory activity, the OFT also allows the evaluation of phenotypes  
123 related to anxiety-like behaviour through analysis of the dwell time or the locomotion  
124 rate in the centre of the open field arena during the first exposure to the apparatus.  
125 Immune stimulated mice (Pool, T1 and T2 groups) showed no difference in dwell time  
126 (data not show) but presented significantly reduced locomotion in the centre of the  
127 open field arena in relation to the non-immune stimulated mice (Control group) (Fig.  
128 3a). It seems, however, that this observation may have been influenced by the total  
129 reduced locomotion observed in animals submitted to Pool and T1 strategies  
130 (Extended data, Fig. 1a). Since no conclusion about anxiety-related behaviour can be  
131 confidently extrapolated from these data, we used the light-dark specific task, a conflict  
132 avoidance test, to address this issue. In this test, immune stimulated mice (Pool, T1  
133 and T2 groups) clearly behaved similarly to mice of the Control group, remaining an  
134 equal time in the light zone (Fig. 3c), and thus implying that immune stimulation did not  
135 generate an anxiety-like state.

136

### 137 **Exposure to type 2 immune stimuli may reverse cognitive-behavioural damage 138 caused by non-severe *P. berghei* ANKA infection**

139 About 92% of the world's malaria cases are due to *Plasmodium falciparum*, 1 to 2% of  
140 which progress to cerebral malaria. Therefore, about 90% of all malaria cases globally  
141 are caused by this lethal species of *Plasmodium* and occur without apparent clinical  
142 complications<sup>28</sup>. Despite the apparent 'non-severe' nature of these cases, there is  
143 growing evidence that non-severe malaria may impair the cognitive development of  
144 children<sup>29-31</sup>.

145 The experimental model we have previously described uses *PbA*-infected C57BL/6  
146 mice treated at day 4 post-infection, prior to the appearance of the clinical signs of CM.  
147 In our opinion, the main advantage of such a model is that it best mimics the human  
148 situation described above that corresponds to the large majority of malaria cases in  
149 the world; non-severe falciparum malaria with timely treatment<sup>28</sup>. Using this model, we  
150 have been able to observe a long-term cognitive-behavioural impairment related to  
151 memory and anxiety as late as 82 days after the end chloroquine (CQ) treatment, when  
152 no parasites are present in the blood<sup>32</sup>.

153 Given the beneficial effect of immune stimulation on long-term memory in healthy mice  
154 described above, we evaluated the effect of the same immune stimuli in mice with  
155 behavioural alterations caused by non-severe malaria infection. *PbA*-infected and  
156 treated mice (from here on referred to as the “Infected group”), did not display reduced  
157 total locomotion in the training session of the OFT when compared to healthy mice  
158 (Extended data, Fig. 1b). However, infected and immune stimulated animals (Inf-Pool  
159 and Inf-T2 groups) showed a significant reduction in locomotion in the OF1 when  
160 compared to healthy mice (Extended data, Fig. 1b). Control, infected and infected-  
161 immune-stimulated groups (Inf-Pool and Inf-T2, but not Inf-T1) displayed normal  
162 behaviour with a significant decrease in locomotion in the test session as compared to  
163 the training session of the OFT (Extended data, Fig. 1b).

164 As expected, there was no object preference in the NORT training session since all  
165 mice explored both familiar objects for the same length of time (for a mean of 25  
166 seconds; data not show) (Fig. 2b, Extended data, Fig. 2b). Consistently, infected mice  
167 presented long-term recognition memory sequelae that manifested as similar  
168 exploration of the familiar object (FO) and new object (NO) in the NORT. This  
169 impairment disappeared following stimuli with Pool or T2 immunization (Fig. 2d,  
170 Extended data, Fig. 2d), pointing to a beneficial effect of immune stimulation triggered  
171 by type 2 immunogens in reversing of the cognitive deficits associated with malaria.

### 172 ***P. berghei* ANKA infection in mice induces an anxiety-like behaviour that is** 173 **reversed by immune stimulation with type 2 immunogens**

174 The distance travelled in the periphery and in the centre of the open field arena are  
175 inversely related. Since the latter was decreased in *PbA*-infected mice (Fig. 3b) and  
176 no change in the locomotion during the training session (OF1) occurred among Control  
177 and Infected groups (Extended data, Fig. 1b), the decrease may be interpreted as the  
178 expression of an anxiety-like behaviour. This behaviour was confirmed by the  
179 observation of a reduction in time spent, by infected mice, in the light zone of the light-  
180 dark task, a more sensitive and widely used test to evaluate anxiety-related parameters  
181 in rodent. The anxiety-like behaviour was reversed by Pool and T2, but not by T1,  
182 strategies of immune stimulation (Fig. 3d).

### 183 184 **Immune stimulation procedures and non-severe *P. berghei* ANKA malaria elicit** 185 **immune responses**

186 The specific immune responses triggered by the immunogens in the Pool, T1 and T2  
187 strategies (tetanus toxoid, influenza, *PfMSP3* and OVA) were evaluated at the end of  
188 the behavioural task experiments, and the effectiveness of the stimuli was confirmed  
189 (Extended data, Fig. 3a,b,c,d). No specific humoral immune response was observed  
190 against diphtheria toxoid (data not show), confirming previous observations of the low  
191 immunogenicity of diphtheria toxoid in mice compared to other experimental models<sup>50</sup>.

192 At the time the immune responses were evaluated (84 days after the end of CQ  
193 treatment), non-immune stimulated infected animals did not present increased levels  
194 of serum cytokines when compared to the Control group (Extended data, Fig.  
195 4a,b,c,d). However, higher levels of TNF $\alpha$ , IFN $\gamma$ , IL-6, IL-10 and/or IL-4 were detectable  
196 in all groups of mice stimulated with T1, T2, or Pool strategies (Extended data, Fig.  
197 4a,b,c,d), ratifying the immune stimulation by the different strategies used.  
198 Interestingly, only IL-10 was consistently increased among healthy and infected mice  
199 stimulated with Pool or T2 strategies, although statistical significance was not achieved  
200 between Pool and Control groups (Extended data, Fig.4e).

201  
202 We evaluated the splenic immune response of healthy and infected mice exposed to  
203 Pool and T2 strategies, since only these approaches were able to immunomodulate  
204 the cognitive behaviour of mice. The immune stimulated healthy mice showed  
205 increased spleen weight and total number of splenocytes (Extended data, Fig. 5a,b,c).  
206 The weight and total number of splenocytes in Infected animals were not different to  
207 those in the Control group (Extended data, Fig. 5a,b,c). As observed in healthy immune  
208 stimulated animals, immune stimulation of *PbA*-infected mice *via* Pool or T2 strategies  
209 induced splenomegaly (Extended data, Fig. 5a,b,c).

210  
211 Healthy mice immune stimulated with either Pool or T2 strategies presented similar  
212 patterns of modulation of different immune components. We observed an increase in  
213 the frequency of splenic B cells (Extended data, Fig. 6b), CD4 and CD8 T cells with  
214 central memory phenotype (Extended data, Fig. 7d,g) and CD4 T cells with regulatory  
215 function (Treg cells) (Extended data, Fig. 6e) in both Pool and T2 immune stimulated  
216 groups when compared to non-immune stimulated animals. A reduction in the  
217 frequency of CD8 T cells was also observed in mice immune stimulated with the T2  
218 strategy when compared to the Control group (Extended data, Fig. 6d).

219 *PbA*-infected mice had higher frequencies of B cells, total CD4 and CD8 T cells  
220 (Extended data, Fig. 6a,b,c), and CD4 and CD8 T cells with naïve and central memory  
221 phenotypes (Extended data, Fig. 7a,b,e,d,g) when compared to healthy mice (Control  
222 group). The frequency of Treg cells, however, was similar between infected and  
223 healthy mice (Extended data, Fig. 6e).

224 Immune stimulation of *PbA*-infected mice with Pool or T2 strategies induced  
225 comparable increases in the frequencies of splenic B cells, Tregs (Extended data,  
226 Fig.6a,b,e), effector/effector memory CD4 T cells and central memory CD8 T cells  
227 (Extended data, Fig.7a,c,g), and reduction in the frequencies of total CD8 T cells when  
228 compared to non-immune stimulated infected mice (Extended data, Fig. 6a,d).

229 In summary, immunological analysis demonstrated that, independently of the health  
230 status of the mice, immune stimulation with type 2 immunogens reduces the frequency  
231 of CD8 T cells and increases the percentage of Treg cells in the spleen, as well as the  
232 serum level of IL-10.

233 Taken together, our data point to a positive influence of immune responses induced by  
234 strategies involving type 2 stimuli on the long-term memory of healthy mice, confirm  
235 our previous demonstration of late neurocognitive behavioural dysfunction following a  
236 single episode of non-severe malaria, and indicate a recovering effect of this deficit  
237 exerted by immune stimulation with type 2 immunogens subsequent to infection.

## 238 DISCUSSION

239

240 Here, we describe for the first time a beneficial modulatory effect of immune stimulation  
241 on cognition in healthy adult mice. Our findings show a clear positive effect of immune  
242 stimuli, specifically triggered by immunization strategies involving type-2 immunogens,  
243 on long-term memory, as verified by the 'new object recognition task' (NORT), a robust  
244 and frequently used behavioural task for the analysis of recognition memory in mice<sup>51</sup>.

245

246 We have previously identified cognitive-behavioural impairment as late sequelae of a  
247 single non-severe malaria episode, using the classical ECM model with treatment of  
248 animals before the presentation of neurological signs or cerebrovascular damage<sup>32,52</sup>.  
249 We propose that this model is appropriate for the study of non-severe *Plasmodium*  
250 *falciparum* malaria<sup>28</sup>, as both parasite-host pairs involve the potentiality of CM  
251 development that can be avoided with timely drug treatment.

252

253 The data described here confirm our previous work, showing that neurological  
254 impairment can occur even in the absence of classical clinical signs of CM<sup>32</sup>. We  
255 propose, therefore, that the term "non-severe malaria" should be used, preferentially  
256 to the classical expression "non-cerebral malaria", to describe the experimental model  
257 or the human situation in which clinical signs of CM are not observable. In agreement  
258 with our observation is the activation of microglia at day 4 post-infection, before the  
259 overwhelming cerebral inflammation and development of the clinical signs of CM<sup>53</sup>.  
260 The levels of proinflammatory cytokines also increase around 3-4 days after *P. berghei*  
261 ANKA infection in C75BL/6 mice<sup>54,55</sup>. It is possible, therefore, that the late cognitive  
262 deficit observed in our studies results from the early activation of immune cells in the  
263 central nervous system (CNS).

264

265 Remarkably, we observed a positive effect of immune stimulation on reversing the  
266 cognitive-behavioural impairment associated with non-severe malaria. Mice treated  
267 with CQ four days after infection by *P. berghei* ANKA and immune stimulated with T2  
268 and Pool strategies did not present the deficit of object recognition recorded after  
269 infection without subsequent immune stimulation. We also observed reversal of  
270 anxiety-like behaviour in a light-dark task, following immune stimulation of infected  
271 mice. Recent data from our laboratory shows that these behavioural changes are  
272 observable as early as 12 days subsequent to malaria treatment (data not shown),  
273 pointing to a reversible potential effect of the immune stimuli.

274

275 The CNS and the immune system interact under homeostatic conditions and a well-  
276 balanced immune response is needed for a proper function of the CNS<sup>6-7</sup>. T cells are  
277 essential for normal neurogenesis and cognition<sup>6,56-58</sup>.

278

279 Communication between peripheral immune cells and CNS takes place in the brain,  
280 probably at the meningeal spaces<sup>6</sup>, where T cells influence the CNS via the production  
281 of cytokines. It has been shown that proinflammatory cytokines impair cerebral function  
282 and cognition at high pathological concentration, as during infections<sup>6</sup>. An exacerbated  
283 peripheral inflammatory response may cause M1 microglial activation and provoke the  
284 production of proinflammatory cytokines such as TNF- $\alpha$  and IL1- $\beta$  that may impair  
285 cognitive function<sup>59</sup>. Elevated levels of anti-inflammatory/regulatory cytokines such as

286 IL-4 and IL-10 may have the opposite effect, inducing M2 microglial activation and  
287 positively influencing cognition<sup>60-62</sup>.

288

289 Treg cells are a subset of T cells with immunomodulatory function, important for  
290 immune and neuronal homeostasis under physiological conditions, and for the control  
291 of pathological immune responses<sup>63-66</sup>. They perform their function mainly *via* secretion  
292 of IL-10 and TGF $\beta$ , anti-inflammatory/regulatory cytokines<sup>63-66</sup>. After ischemic brain  
293 stroke, there is massive accumulation of Treg cells in the mouse brain<sup>67</sup>, where they  
294 decrease inflammatory cell infiltration and microglia activation, antagonize the  
295 production of proinflammatory cytokines and, consequently, reduce brain damage  
296 through a mechanism involving IL-10 secretion<sup>68</sup>. The neuroprotective activity of Treg  
297 cells has also been described in murine models of Parkinson's disease, HIV-1-  
298 associated neurodegeneration and amyotrophic lateral sclerosis<sup>69-72</sup>.

299

300 In this study, healthy and infected-mice stimulated with strategies involving type 2  
301 immunogens (Pool and T2 groups) significantly increased the number of splenic Treg  
302 cells and IL-10 level in the serum. Considering that Treg cells and IL-10 can restrict  
303 neuroinflammation<sup>71-76</sup>, it is reasonable to assume that the immunization strategies  
304 used likely improve cognitive function by promoting a balanced cross-talk between the  
305 immune system and the CNS mediated through Treg cells and IL-10. The mechanism  
306 by which immune stimulation with type-2 immunogens benefits cognition is presently  
307 under investigation.

308

309 The results reported here may offer a new paradigm for the design of memory  
310 improvement strategies. Our data suggest that vaccination procedures may provide  
311 benefits additional to the prevention of infection, offering a potential approach for  
312 boosting cognition function in healthy individuals, and in helping the recovery of those  
313 whose cognition may have been impaired by chronic and infectious diseases, including  
314 malaria, and by the effects of ageing.

315

316

## 317 REFERENCES

318

319 1. Jerne NK. Idiotypic networks theory and other preconceived ideas. *Immunol*  
320 *Rev.* 1984;79:5-24.

321 2. Cohen, IR. The cognitive paradigm and the immunological homunculus.  
322 *Immunol Today.* 1992;13(12):490-4.

323 3. Cohen IR. Discrimination and dialogue in the immune system. *Semin*  
324 *Immunol.* 2000;12(3):215-9.

325 4. Daniel-Ribeiro CT, Martins YC. *Imagens, Micróbios e Espelhos: os sistemas*  
326 *imune e nervoso e nossa relação com o ambiente.* Rio de Janeiro: Ed.  
327 *Fiocruz.* 2017;3:161-162.

328 5. Kivisakk P, Imitola J, Rasmussen S, Elyaman W, Zhu B, Ransohoff RM, et  
329 al. Localizing central nervous system immune surveillance: meningeal  
330 antigen presenting cells activate T cells during experimental autoimmune  
331 encephalomyelitis. *Ann Neurol.* 2009;65(4):457-469.

- 332 6. Kipnis J, Gadini S, Derecki N. Pro-cognitive properties of T cells. *Nat Rev*  
333 *Immunol.* 2012;12(9):663-669.
- 334 7. Nataf S. Autoimmunity as a Driving Force of Cognitive Evolution. *Front*  
335 *Neurosci.* 2017;11:582.
- 336 8. Schwartzer JJ, Careaga M, Coburn MA, Rose DR, Hughes HK, Ashwood P.  
337 Behavioral impact of maternal allergic-asthma in two genetically distinct  
338 mouse strains. *Brain Behav Immun.* 2017;63:99-107.
- 339 9. Mueller FS, Polesel M, Richetto J, Meyer U, Weber-Stadlbauer U. Mouse  
340 models of maternal immune activation: Mind your caging system! *Brain*  
341 *Behav Immun.* 2018;73:643-660.
- 342 10. Yang J, Qi F, Gu H, Zou J, Yang Y, Yuan Q et al. Neonatal BCG vaccination  
343 of mice improves neurogenesis and behavior in early life. *Brain Res Bull.*  
344 2016;120:25–33.
- 345 11. Bossu P, Cutuli D, Palladino I, Caporali P, Angelucci F, Laricchiuta D et. al.  
346 A single intraperitoneal injection of endotoxin in rats induces long-lasting  
347 modifications in behavior and brain protein levels of TNF- $\alpha$  and IL-18. *J*  
348 *Neuroinflammation.* 2012;9:101.
- 349 12. Depino AM. Early prenatal exposure to LPS results in anxiety- and  
350 depression-related behaviors in adulthood. *Neuroscience.* 2015;299:56-65.
- 351 13. Kannan G, Pletnikov MV. *Toxoplasma gondii* and Cognitive Deficits in  
352 Schizophrenia: An Animal Model Perspective. *Schizophr Bull.*  
353 2012;38(6):1155–1161.
- 354 14. Iqbal J, Mueller U. Virus infection causes specific learning deficits in  
355 honeybee foragers. *Proc Biol Sci.* 2007;274:1517-1521.
- 356 15. Odera VM, Snow RW, Newton CRJC. The burden of the neurocognitive  
357 impairment associated with *Plasmodium falciparum* malaria in sub-Saharan  
358 Africa. *Am J Trop Med Hyg.* 2004;71(2 Suppl):64-70.
- 359 16. Carter JA, Lees JA, Gona JK, Murira G, Rimba K, Neville BGR et al. Severe  
360 *falciparum* malaria and acquired childhood language disorder. *Dev Med Child*  
361 *Neurol.* 2006;48(1):51-7.
- 362 17. Boivin MJ, Bangirana P, Byarugaba J, Opoka RO, Idro R, Jurek AM et al.  
363 Cognitive impairment after cerebral malaria in children: a prospective study.  
364 *Pediatrics.* 2007;119(2):e360-6.
- 365 18. John CC, Bangirana P, Byarugaba J, Opoka RO, Idro R, Jurek AM et al.  
366 Cerebral malaria in children is associated with long-term cognitive  
367 impairment. *Pediatrics.* 2008;122(1):e92-9.
- 368 19. Kihara M, Carter JA, Holding PA, Vargha-Khadem F, Scott RC, Idro R et al.  
369 Impaired everyday memory associated with encephalopathy of severe  
370 malaria: the role of seizures and hippocampal damage. *Malar J.* 2009;8:273.
- 371 20. Holmberg D, Franzén- Rohl E, Idro R, Opoka RO, Bangirana P, Sellgren CM  
372 et. al. Cerebrospinal fluid kynurenine and kynurenic acid concentrations are  
373 associated with coma duration and long-term neurocognitive impairment in  
374 Ugandan children with cerebral malaria. *Malar J.* 2017;16(1):303.



- 375 21. Thuilliez J, Sissoko MS, Toure OB, Kamate P, Berthelemy JC, Doumbo OK.  
376 Malaria and primary education in Mali: a longitudinal study in the village of  
377 Donéguébougou. *Soc Sci Med.* 2010;71(2):324-34.
- 378 22. Bangirana P, Allebeck P, Boivin MJ, John CC, Page C, Ehnvall A, et al.  
379 Cognition, behaviour and academic skills after cognitive rehabilitation in  
380 Uganda children surviving severe malaria: a randomised trial. *BMC Neurol.*  
381 2011;11:96.
- 382 23. Fink G, Olgiati A, Hawela M, Miller JM, Matafwali B. Association between  
383 early childhood exposure to malaria and children's pre-school development  
384 evidence from Zambia early childhood development project. *Malar J.*  
385 2013;12:12.
- 386 24. Vorasan N, Pan-Ngum W, Jittamala P, Maneeboonyang W, Rukmanee P,  
387 Lawpoolsri S. Long-term impact of the childhood malaria infection on school  
388 performance among school children in a malaria endemic area along the  
389 Thai-Myanmar border. *Malar J.* 2015;14:401.
- 390 25. Reverchon F, Mortaud S, Sivoyon M, Maillet I, Laugeray A, Palomo J et al.  
391 IL-33 receptor ST2 regulates the cognitive impairments associated with  
392 experimental cerebral malaria. *PloS Pathog.* 2017;13(4):e1006322.
- 393 26. Desruisseaux MS, Gulinello M, Smith DN, Lee SC, Tsuji M, Weiss LM et al.  
394 Cognitive dysfunction in mice infected with *Plasmodium berghei* strain ANKA.  
395 *J Infect Dis.* 2008;197(11):1621-7.
- 396 27. Reis PA, Comim CM, Hermani F, Silva B, Barichello T, Portella AC et al.  
397 Cognitive dysfunction is sustained after rescue therapy in experimental  
398 cerebral malaria, and is reduced by additive antioxidant therapy. *PloS*  
399 *Pathog.* 2010;6(6):e1000963.
- 400 28. World Health Organization. World Malaria Report. Geneva: WHO; 2019.
- 401 29. Fernando SD, Gunawardena DM, Bandara MRSS, De Silva D, Carter R,  
402 Mendis KN et al. The impact of repeated malaria attacks on the school  
403 performance of children. *Am J Trop Med Hyg.* 2003;69(6):582-8.
- 404 30. Vitor-Silva S, Reyes-Lecca RC, Pinheiro TRA, Lacerda MVG. Malaria is  
405 associated with poor school performance in endemic area of the Brazilian  
406 Amazon. *Malar J.* 2009;8:230.
- 407 31. Tapajós R, Castro D, Melo G, Balogun S, James M, Pessoa R et al. Malaria  
408 impact on cognitive function of children in a peri-urban community in the  
409 Brazilian Amazon. *Malar J.* 2019;18(1):173.
- 410 32. de Sousa LP, Almeida RF, Ribeiro-Gomes FL, Carvalho LJM, Souza TM,  
411 Souza DOG & Daniel-Ribeiro CT. Long-term effect of uncomplicated  
412 *Plasmodium berghei* ANKA malaria on memory and anxiety-like behaviour in  
413 C57BL/6 mice. *Parasit Vectors.* 2018;11(1):191.
- 414 33. Lavigne MV, Castro M, Mateo N, Deluchi S, Atzori C, Piudo L et al. Whole-  
415 cell *Bordetella pertussis* vaccine component modulates the mouse immune  
416 response to an unrelated soluble antigen. *Microbes Infect.* 2002;4(8)815-  
417 820.

- 418 34. Castilho SF, Chovel ML, Hernández NG, González LC, Blanco A, Hernández  
419 DS et al. A Bordetella pertussis proteoliposome induces protection in mice  
420 without affecting the immunogenicity of diphtheria and tetanus toxoids in a  
421 trivalent formulation. *Clin Exp Vaccine Res.* 2016;5(2):175-178.
- 422 35. Goodier MR, Rodriguez-Galan A, Lusa C, Nielsen CM, Darboe A,  
423 Moldoveanu AL et al. Influenza Vaccination Generates Cytokine-Induced  
424 Memory-like NK Cells: Impact of Human Cytomegalovirus Infection. *J*  
425 *Immunol.* 2016;197(1):313-325.
- 426 36. Zhu W, Li S, Wang C, Yu G, Prausnitz MR, Wang BZ. Enhanced immune  
427 responses conferring cross-Protection by skin Vaccination With a Tri-  
428 component influenza Vaccine Using a Microneedle Patch. *Front Immunol.*  
429 2018;9:1705.
- 430 37. Brahim K, Pérignon JL, Bossus M, Gras H, Tartar A, Druilhe P. Fast  
431 immunopurification of small amounts of specific antibodies on peptides  
432 bound to ELISA plates. *J Immunol Methods.* 1993;162(1):69-75.
- 433 38. Oeuvray C, Bouharoun-Tayoun H, Grass-Masse H, Lepers JP, Ralamboranto  
434 L, Tartar A et al. A novel merozoite surface antigen of *Plasmodium falciparum*  
435 (MSP-3) identified by cellular-antibody cooperative mechanism antigenicity  
436 and biological activity of antibodies. *Mem Inst Oswaldo Cruz.* 1994;89(2):77-  
437 80.
- 438 39. Daher LJ, Demanga CG, Prieur E, Pérignon JL, Bouharoun-Tayoun H,  
439 Druilhe P. Toward the rational design of a malaria vaccine construct using the  
440 MSP3 family as an example: contribution of immunogenicity studies in  
441 models. *Infect Immun.* 2010;78(1):477-485.
- 442 40. Matos DCS, Marcovistz R, Cabello PH, Georgini AR, Sakauchi D, Silva LL.  
443 Immunogenicity Test of Tetanus Component in Adsorbed Vaccines by Toxin  
444 Binding Inhibition Test. *Mem Inst Oswaldo Cruz.* 2002;97(6):909-913.
- 445 41. Lima MCR, Prouvost-Danon A, Patricia MR, Chagas MS, Calheiros AS,  
446 Cordeiro RSB. Studies on the mechanisms involved in antigen-evoked  
447 pleural inflammation in rats: contribution of IgE and complement. *J Leukoc*  
448 *Biol.* 1997;61(3):286-292.
- 449 42. Comoy EE, Capron A, Thyphronitis G. In vivo induction of type 1 and 2  
450 immune responses against protein antigens. *Int Immunol.* 1997;9(4):523-  
451 531.
- 452 43. Terhune TD, Deth RC. Aluminum Adjuvant-Containing Vaccines in the  
453 Context of the Hygiene Hypothesis: A Risk Factor for Eosinophilia and Allergy  
454 in a Genetically Susceptible Subpopulation? *Int J Environ Res Public Health.*  
455 2018;15(5):901.
- 456 44. Bosmann M, Russkampa NF, Warda PA. Fingerprinting of the TLR4-induced  
457 acute inflammatory response. *Exp Mol Pathol.* 2012;93(3):319-323.
- 458 45. Kozyreva VS, Subbotovskaia AI, Shilova AN, Karpenko AA. Immunological  
459 aspects of formation of restenoses after endothelial lesions. *Angiol Sosud*  
460 *Khir.* 2014;20(1):21-26.

- 461 46. Couch Y, Trofimov A, Markova N, Nikolenko V, Steinbusch HW, Chekhonin  
462 V et al. Low-dose lipopolysaccharide (LPS) inhibits aggressive and augments  
463 depressive behaviours in a chronic mild stress model in mice. *J*  
464 *Neuroinflammation*. 2016;13(1):108.
- 465 47. Fontana MF, Baccarella A, Kellar D, Oniskey TK, Terinate P, Rosenberg SD  
466 et. al. Myeloid expression of the AP-1 transcription factor JUNB modulates  
467 outcomes of type 1 and type 2 parasitic infections. *Parasite Immunol*.  
468 2015;37(9):470-478.
- 469 48. Almeida RF, Ganzella M, Machado DG, Loureiro SO, Leffa D, Quiconzes-  
470 Santos A et al. Olfactory bulbectomy in mice triggers transient and longlasting  
471 behavioural impairments and biochemical hippocampal disturbances. *Prog*  
472 *Neuropsychopharmacol Biol Psychiatry*. 2017;76:1-11.
- 473 49. Figueiredo CP, Clarke JR, Ledo JH, Ribeiro FC, Costa CV, Melo HM et al.  
474 Memantine rescues transient cognitive impairment caused by highmolecular-  
475 weight a $\beta$  oligomers but not the persistent impairment induced by low-  
476 molecular-weight oligomers. *J Neurosci*. 2013;33(23):9626-34.
- 477 50. Maheshwari SC, Sbarma SB, Ahujat S, Saxena SN. Development of a mouse  
478 model to estimate the potency of the diphtheria toxoid component of  
479 diphtheria-tetanus and diphtheria-tetanus-pertussis vaccines. *J Biol Stand*.  
480 1988;16(3):139-146.
- 481 51. Leger M, Quiedeville A, Bouet V, Haelewyn B, Boulouard M, Schumann-Bard  
482 P et al. Object recognition test in mice. *Nat Protoc*. 2013;8(12):2531-2537.
- 483 52. Potter S, Chan-Ling T, Ball HJ, Mansour H, Mitchell A, Maluish L, et al.  
484 Perforin mediated apoptosis of cerebral microvascular endothelial cells during  
485 experimental cerebral malaria. *Int J Parasitol*. 2006;36(4):485-496.
- 486 53. Pais TF, Chatterjee S. Brain macrophage activation in murine cerebral  
487 malaria precedes accumulation of leukocytes and CD8+ T cell proliferation.  
488 *J Neuroimmunol*. 2005;163(1-2):73-83.
- 489 54. Hanum S, Hayano M, Kojima S. Cytokine and chemokine responses in a  
490 cerebral malaria-susceptible or-resistant strain of mice to *Plasmodium*  
491 *berghei* ANKA infection: early chemokine expression in the brain. *Int*  
492 *Immunol*. 2003;15(5):633-640.
- 493 55. Hansen DS, Siomos MA, Buckingham L, Scalzo AA, Schofield L. Regulation  
494 of Murine Cerebral Malaria Pathogenesis by CD1d-Restricted NKT Cells and  
495 the Natural Killer Complex. *Immunity*. 2003;18(3):391-402.
- 496 56. Ziv Y, Ron N, Butovsky O, Landa G, Sudai E, Greenberg N et al. Immune  
497 cells contribute to the maintenance of neurogenesis and spatial learning  
498 abilities in adulthood. *Nat Neurosci*. 2006;9(2):268-275.
- 499 57. Baruch K, Schwartz M. CNS-specific T cells shape brain function via the  
500 choroid plexus. *Brain Behav Immun*. 2013;34:11-16.
- 501 58. Radjavi A, Smirnov I, Kipnis J. Brain antigen-reactive CD4+ T cells are  
502 sufficient to support learning behavior in mice with limited T cell repertoire.  
503 *Brain Behav Immun*. 2014;35:58-63.

- 504 59. Hoogland ICM, Houbolt C, Westerloo DJV, Gool WAV and Beek DV.  
505 Systemic inflammation and microglial activation: systematic review of animal  
506 experiments. *J Neuroinflammation*. 2015;12:114.
- 507 60. Derecki NC, Cardani AN, Yang CH, Quinnes KM, Crihfield A, Lynch KR et  
508 al. Regulation of learning and memory by meningeal immunity: a key role for  
509 IL-4. *J Exp Med*. 2010;207(5):1067-1080.
- 510 61. Tang Y, Le W. Differential Roles of M1 and M2 Microglia in  
511 Neurodegenerative Diseases. *Mol Neurobiol*. 2016;53(2):1181-1194.
- 512 62. Qi F, Zuo Z, Yang J, Hu S, Yang Y, Yuan Q et al. Combined effect of BCG  
513 vaccination and enriched environment promote neurogenesis and spatial  
514 cognition via a shift in meningeal macrophage M2 polarization. *J*  
515 *Neuroinflammation*. 2017;14(1):32.
- 516 63. O'Garra A, Vieira P. Regulatory T cells and mechanisms of immune system  
517 control. *Nat Med*. 2004;10(8):801-805.
- 518 64. Anderson KM, Olson KE, Estes KA, Flanagan K, Gendelman HE, Mosley RL.  
519 Dual destructive and protective roles of adaptive immunity in  
520 neurodegenerative disorders. *Transl Neurodegener*. 2014;3(1):25.
- 521 65. Panduro M, Benoist C, Mathis D. Tissue Tregs. *Annu Rev Immunol*. 2016;  
522 34:609-633.
- 523 66. Evans FL, Dittmer M, de la Fuente AG, Fitzgerald DC. Protective and  
524 Regenerative Roles of T Cells in Central Nervous System Disorders. *Front*  
525 *Immunol*. 2019;10:2171.
- 526 67. Ito M, Komai K, Mise-Omata S, Iizuka-Koga M, Noguchi Y, Kondo T et al.  
527 Brain regulatory T cells suppress astrogliosis and potentiate neurological  
528 recovery. *Nature*. 2019;565(7738):246-250.
- 529 68. Liesz A, Suri-Payer E, Veltkamp C, Doerr H, Sommer C, Rivest S et al.  
530 Regulatory T cells are key cerebroprotective immunomodulators in acute  
531 experimental stroke. *Nat Med*. 2009;15(2):192-199.
- 532 69. Reynolds AD, Banerjee R, Liu J, Gendelman HE, Mosley RL.  
533 Neuroprotective activities of CD4+CD25+ regulatory T cells in an animal  
534 model of Parkinson's disease. *J Leukoc Biol*. 2007;82(5):1083-1094.
- 535 70. Banerjee R, Mosley RL, Reynolds AD, Dhar A, Jackson-Lewis V, Gordon PH  
536 et al. Adaptive immune neuroprotection in G93ASOD1 amyotrophic lateral  
537 sclerosis mice. *PLoS One*. 2008;3(7):e2740.
- 538 71. Liu J, Gong N, Huang X, Reynolds AD, Mosley RL, Gendelman HE.  
539 Neuromodulatory activities of CD4+CD25+ regulatory T cells in a murine  
540 model of HIV-1-associated neurodegeneration. *J Immunol*.  
541 2009;182(6):3855-3865.
- 542 72. Liesz A, Suri-Payer E, Veltkamp C, Doerr H, Sommer C, Rivest S et al.  
543 Regulatory T cells are key cerebroprotective immunomodulators in acute  
544 experimental stroke. *Nat Med*. 2009;15(2):192-199.
- 545 73. Reynolds AD, Stone DK, Hutter JA, Benner EJ, Mosley RL, Gendelman HE.  
546 Regulatory T cells attenuate Th17 cell-mediated nigrostriatal dopaminergic

547 neurodegeneration in a model of Parkinson's disease. *J Immunol.*  
548 2010;184(5):2261-2271.

549 74. Kelly LD, Li X, Kilday C, Feldman S, Clark S, Liu F et al. Increased circulating  
550 regulatory T cells in medicated people with schizophrenia. *Psychiatry Res.*  
551 2018;269:517-523.

552 75. Ito M, Komai K, Mise-Omata S, Iizuka-Koga M, Noguchi Y, Kondo T et al.  
553 Brain regulatory T cells suppress astrogliosis and potentiate neurological  
554 recovery. *Nature.* 2019;565(7738):246-250.

555 76. Machhi J, Kevadiya BD, Muhammad IJ, Herskovitz J, Olson KE, Mosley RL  
556 et al. Harnessing regulatory T cell neuroprotective activities for treatment of  
557 neurodegenerative disorders. *Mol Neurodegener.* 2020;15(1):32.

558

559

## 560 **ACKNOWLEDGEMENTS**

561 LPS is grateful to the *Programa de Pós-Graduação em Biologia Parasitária* of *Instituto*  
562 *Oswaldo Cruz (IOC)*, *Fundação Oswaldo Cruz (Fiocruz)* for the Doctoral fellowship.  
563 The authors are grateful to Professor Richard Culleton for his kindness carefully  
564 reading the final version of this manuscript and for the valuable comments and  
565 suggestions for the improvement of the text. We do also thank Doctor Leonardo  
566 Carvalho for his critical review and welcome discussions. We are indebted  
567 to the *Laboratório de Inflamação* (Dr. Marco Aurélio Martins and Dr. Tatiana  
568 Ferreira), *Laboratório de Pesquisa em Malária* (Luana Santos and Thalita  
569 Ferraz), *Laboratório de Pesquisa sobre o Timo* of the *IOC-Fiocruz* (Dr. Daniella  
570 Mendes Arêas and Dr. Dyna Raposo) of *IOC*; *Biomanguinhos* (Dr. Maria de Lourdes  
571 de Sousa Maia, Alessandro Fonseca, Camilla Bayma and Dr. Denise Cristina Matos)  
572 and *Farmanguinhos* (Dr. Márcia Coronha Ramos Lima and Dr. Andréa Luca)  
573 of *Fiocruz* and *Instituto Butantan* (Dr. Jorge Kalil and Dr. Paulo Lee Ho and Aline  
574 Abrantes) and *Vac4all* (Dr. Pierre Duiilhe) for reagent supply and study of the immune  
575 responses to vaccines.

576

577

## 578 **FUNDING**

579 The work received financial support from the Instituto Oswaldo Cruz's POM, Fiocruz.  
580 This work is part of LPS's PhD research supported by *Capes* (Brazil) and  
581 by *Faperj* (RJ, Brazil) fellowships. GLW, DOS and CTDR are supported by *CNPq*,  
582 Brazil, through a Productivity Research Fellowship and GLW and CTDR are "*Cientistas*  
583 *do Nosso Estado*" recognized by the *Faperj*. The *Laboratório de Pesquisa em Malária*  
584 (*LPM*), *IOC*, *Fiocruz* and the *Departamento de Bioquímica* of the *Universidade*  
585 *Federal do Rio Grande do Sul* are National Institutes of Science & Technology (INCT)  
586 Associated Laboratories. The *LPM* is also an Associated Laboratory of the  
587 Neuroinflammation Network of the *Faperj*.

588

589

## 590 **AUTHOR CONTRIBUTIONS**

591 LPS was responsible for the realization of all experiments (including infection and  
592 treatment; immune stimulation, and conduction, observation and data

593 collection/systematisation of cognitive tests and immune response analyses in mice),  
594 helped in the analysis and interpretation of tests and drafted the manuscript. FLRG  
595 followed all stages of the experiment, realization of experiments, discussed the  
596 protocols and the project, was in charge of the analysis and discussion of immune  
597 response data and helped in drafting the manuscript. RFA and TMS helped in  
598 systematization of data concerning behavioural tests and analysed and interpreted the  
599 cognitive data. GW proposed the statistical analyses of the data and was responsible  
600 for them. DOS discussed the project since its conception and helped in designing the  
601 experiments. CTDR is responsible for conception and design of the study, and helped  
602 in data analysis, interpretation and drafting and finalizing the manuscript together with  
603 LPSV and FLRG. All authors read, reviewed and approved the final manuscript.  
604

605

## 606 **COMPETING INTERESTS**

607 The authors declare that they have no competing interests.  
608

609

## 610 **METHODS**

611

612 **Mice and Parasite.** The *Instituto de Ciência e Tecnologia em Biomodelos* of the  
613 *Fundação Oswaldo Cruz* (ICTB- *Fiocruz*, Brazil) provided seven-week-old C57BL/6  
614 female mice weighing 20-25 g. Mice were housed in racks with an air filtration system  
615 in a room maintained at 25°C and light/dark cycles of 12 hours in cages containing five  
616 animals with free acquisition to food and water. All procedures were carried out in  
617 accordance with animal welfare approved by the Ethical Committee on the Use of  
618 Laboratory Animals of *Instituto Oswaldo Cruz* under *CEUA-IOC*: L-010/2015  
619 concession. *Plasmodium berghei* ANKA (*PbA*) infections were carried out using a  
620 stable transfected strain of *PbA* expressing a green fluorescent protein (*PbA-GFP*)  
621 generated as described previously<sup>1</sup>.  
622

623

624 **Infection and treatment of experimental groups.** C57BL/6 mice were infected  
625 intraperitoneally (ip) with 150 µl of *PbA*-infected red blood cells, cryopreserved and  
626 thawed. Five days after infection, the total blood was collected, adjusted to  $1 \times 10^6$   
627 parasitized erythrocytes in 100 µl of PBS and injected ip to C57BL/6 mice from the  
628 experimental groups. Parasitaemia was monitored by flow cytometry, based on the  
629 percentage of GFP<sup>+</sup> erythrocytes. In this experimental model, the establishment of  
630 cerebral malaria (CM) occurs between the fifth and sixth day of infection<sup>2</sup>. In this study,  
631 mice were treated on the fourth day of infection (mean parasitaemia 2.5%) with 25  
632 mg/kg of chloroquine (CQ) by gavage for seven days<sup>3</sup>, before any clinical sign of CM.  
633 All groups were similarly manipulated. Experiments carried out with groups of  
634 uninfected mice treated with CQ or not (control group received PBS) have previously  
635 shown that the CQ treatment did not influence the performance in behavioural tasks  
636 and anxiety phenotype<sup>4</sup>.  
637

638

639 **Experimental Description.** C57BL/6 mice were divided into groups of *PbA*-infected  
640 and Control animals (non-infected) and both were treated with chloroquine (CQ) for  
641 seven days from the fourth day of infection. Thirteen days after treatment, mice from  
642 respective groups were subdivided into non-immune stimulated and immune  
643 stimulated groups (Fig. 1). The following vaccines and antigens were used for immune

642 stimulation: Diphtheria and Tetanus toxoids (dT) vaccine for adults, Influenza vaccine,  
643 *Plasmodium falciparum* Merozoite Surface Protein 3 (*PfMSP-3* recombinant protein),  
644 White chicken egg ovalbumin (OVA) and Lipopolysaccharide of *Escherichia coli*  
645 (*EcLPS*). Three different immune stimulation strategies were performed: a combination  
646 of all antigens and vaccines described above (from here now, called Pool); a  
647 combination of antigens and vaccines (Influenza vaccine and *EcLPS*) that trigger,  
648 preferentially, a type 1 pattern of immune response (from here now, denominated T1);  
649 and a combination of antigens and vaccines (dT vaccine, *PfMSP-3* recombinant  
650 protein and OVA) that trigger, preferentially, a type 2 pattern of immune response (from  
651 here now, called T2). The groups of mice were denominated: Control (non-infected /  
652 non-immune stimulated); Pool (non-infected / Pool-immune stimulated); T1 (non-  
653 infected / T1-immune stimulated); T2 (non-infected / immune stimulated); Inf (infected  
654 / non-immune stimulated); Inf-Pool (infected / Pool-immune stimulated); T1 (infected /  
655 T1-immune stimulated) and T2 (infected / T2-immune stimulated). All control groups  
656 were treated as the experimental groups: they were age-matched, mock-immune  
657 stimulated, mock-infected, and treated with CQ whenever appropriate. Subsequently,  
658 mice behavioural performance was assessed by Open Field Test (OFT), Novel Object  
659 Recognition Test (NORT) and Light-Dark (Fig. 1). About 300 mice were used for these  
660 experimental strategies in five consecutive sessions.

661 **Immune system stimuli.** The immune stimulation was initiated fourteen days after the  
662 end of CQ treatment, being performed in the course of the following sixty-two days  
663 (Fig. 1). Antigens and/or vaccines were administered by different routes and in different  
664 regions of the animal's body (Table 1). The doses administrated were defined based  
665 on dose-response protocols available in the literature capable of stimulating the murine  
666 immune system without imparting risk of death to mice immune stimulated<sup>5-12</sup>.

667  
668 *Immune stimulation with Plasmodium falciparum Merozoite Surface Protein 3 (PfMSP-3*  
669 *recombinant protein).* The mice were challenged with 10 µg of *PfMSP-3*/mice  
670 recombinant protein (in collaboration with Clinical Trials of Malaria Vaccines (Vac4All  
671 Initiative), Paris, France) adsorbed on 70% adjuvant solution MONTANIDE™ ISA 50  
672 V2 W / O (SEPPIC. Air Liquide - Healthcare), in 100 µl of PBS. Three subcutaneous  
673 injection were performed at the tail region with a twenty-day interval between immune  
674 stimulations<sup>9-10</sup> (Fig. 1, Table 1).

675  
676 *Immune stimulation with Tetanus-Diphtheria and Influenza Vaccines.* The vaccines  
677 used in this study were: Tetanus-Diphtheria (dT) double bacterial (Biological E Limited  
678 - BE, Telangana - India, Lot. 34005815), in collaboration with the Division of Health  
679 Surveillance - CAP 3.1 of the *Fundação Oswaldo Cruz* (Rio de Janeiro, Brazil); and  
680 Trivalent Influenza granted by the Technological Development and Production Division  
681 of *Instituto Butantan* (São Paulo, Brazil, Lot. 160034). Mice received 100 µl (1/5 of the  
682 human dose) of dT and Influenza vaccines by subcutaneous (dorsal region) and  
683 intramuscular (left quadriceps region) routes, respectively (Table 1). Three inoculations  
684 with a twenty-day interval between immune stimulations were performed<sup>5-6</sup> (Fig. 1).

685  
686 *Immune stimulation with Ovalbumin (allergen).* Mice received 50 µg/mice of white  
687 chicken egg ovalbumin (SIGMA-ALDRICH, Cod. A5503-50g) adsorbed onto  
688 aluminum hydroxide [Al (OH) 3] in a final volume of 200 µl per animal in three  
689 inoculations. The first inoculation was performed at the dorsal region by subcutaneous

690 injection and the following (second and third inoculation) by ip route (Table 1) with six  
691 days between them<sup>11</sup> (Fig. 1).

692

693 *Immune stimulation with Lipopolysaccharide from Escherichia coli (EcLPS)*. Mice were  
694 challenged with 0.1 mg/kg of EcLPS O111: B4 (SIGMA-ALDERICH, L2630-10MG, Lot  
695 025M4040V12140701) diluted in phosphate-buffered saline (PBS). Two ip inoculations  
696 were performed (Table 1) with a range of nine days between the immune stimulations<sup>12</sup>  
697 (Fig. 1).

698

699 **Evaluation of the immune response.** Following stimulation of the immune system,  
700 mice were randomly selected and sacrificed for individual withdrawal of whole blood,  
701 *via* cardiac puncture, and spleen at day 84 after the end of CQ treatment. Serum  
702 samples were preserved at -70 °C. Total IgG antibody response to P $\alpha$ MSP-3  
703 recombinant protein, Tetanus-Diphtheria toxoids (dT) and Influenza vaccines; the  
704 serum cytokine profile; the splenic lymphocyte subpopulations; and the response to  
705 Ovalbumin sensitization were evaluated.

706

707 *Specific antibody responses.* The antibody response against P $\alpha$ MSP-3 recombinant  
708 protein and Influenza vaccine were determinate by conventional Enzyme-Linked  
709 immunosorbent Assay – ELISA<sup>9-10</sup>, and the antibody response against dT vaccine was  
710 determined by Toxin Binding Inhibition – ToBI<sup>13</sup>.

711

712 *Cytokine profile.* Cytokines in the serum samples were measured with Cytometric Bead  
713 Array (CBA) Mouse Th1/Th2/Th17 (BD Biosciences) according to the manufacturer  
714 instructions. The data were collected on the BD FACSCANTO II flow cytometer and  
715 analysed by FCAP Array<sup>TM</sup> Software (BD Bioscience).

716

717 *Splenic lymphocyte subpopulations.* Individual spleens were removed and  
718 mechanically dissociated using a syringe plunger above 70  $\mu$ m-pore size Falcon cell  
719 strainer (BD Biosciences). Red blood cells were lysed using ACK lysing buffer (Sigma).  
720 Single-cell suspensions were counted and incubated with anti-Fc $\gamma$  III/II (CD16/32)  
721 receptor Ab (2.4G2) in PBS containing 3% FCS for 15 min, and immunolabelled for 30  
722 min at 4°C in the dark with the following fluorochrome-conjugated antibodies: PE-Cy7  
723 anti-mouse CD8 (53-6.7), PerCP-Cy5.5 anti-CD3 (145-2c11), APC-H7 anti-mouse  
724 CD4 (GK1.5), APC anti-mouse B220 (RA3-6B2), BB515 anti-mouse CD62L (MEL14),  
725 APC anti-mouse CD44 (IM7) and/or PE anti-mouse CD25 (7D4). For Treg cells  
726 analyses, cells were fixed and permeabilized, after staining for surface markers, with  
727 eBioscience<sup>TM</sup> Foxp3/Transcription Factor Staining Buffer Set according to the  
728 manufacturer instructions and incubated with the antibody Alexa Flour 647 anti-Foxp3  
729 (R16715). All antibodies were from BD Biosciences. Data were collected using  
730 FACSDiva software on a FACSCANTO II flow cytometer (BD Biosciences), and  
731 analysed using FlowJo software (TreeStar).

732

733 *Intradermal skin test.* In the footpad of the left paw, 3  $\mu$ g of OVA, diluted in 30  $\mu$ l of  
734 PBS, were injected in each animal. After 30 minutes, the plantar thickness (mm) was  
735 measured using a digital caliper. Oedema formation was expressed as the difference  
736 of the pad thickness measured before and after the inoculation of OVA<sup>11</sup>.

737



738 **Behavioral analysis.** The schedule of the behavioral tasks is shown in Methods Fig.  
739 1. Mice were individually submitted to different behavioral paradigms to evaluate their  
740 exploratory and locomotor activity, cognitive abilities, and parameters involved in  
741 anxiety-like behavior from day 88 to 92 post-infection (77 to 81 days after the complete  
742 parasitological cure of animals obtained with CQ treatment). The beginning of  
743 behavioral tests corresponded to 22 days after the last stimulation with P<sub>MS</sub>P-3  
744 recombinant protein, Tetanus-Diphtheria, and Influenza vaccines, 7 days after the last  
745 injection of ovalbumin, and three days after the LPS final inoculation. The same cohort  
746 of mice was used in all tasks (Methods Fig. 1). All experiments were carried out with  
747 an incandescent light source of 200 lux of intensity in the evening period. Animals were  
748 acclimatized in the experimental room at least for 2 hours before the experimental  
749 sessions. Behavior was captured by a video camera positioned above the task  
750 apparatus. Locomotion in the open field and the object recognition task was analyzed  
751 by the AnyMaze® software (Stoelting Co., Wood Dale, IL, USA), while a trained blind-  
752 to-treatment researcher evaluated other behavioral parameters by video analysis. In  
753 all behavioral tests, mice were individually placed on the apparatus, which was  
754 previously cleaned with 70% alcohol and dried.

755  
756 *Open Field Task (OFT).* To address the effect of immune stimuli on locomotion and on  
757 long-term habituation, mice were individually submitted to the OFT with a training  
758 (OFT1) and a test (OFT2) session 24 hours apart, as described elsewhere<sup>4</sup>. In each  
759 OFT session, mice were individually allowed to freely explore a grey acrylic square  
760 box, dimensions (50 × 50 × 50 cm, length × width × height), for 10 minutes. In OFT1,  
761 locomotor activity was evaluated during the first three minutes (short-term habituation  
762 to novelty) and the last six minutes of the session, and the time and distance traveled  
763 in the center zone during the entire session. In OFT2, we evaluated the first three and  
764 the last seven minutes of the total distance traveled.

765  
766 *Novel Object Recognition Task (NORT).* To evaluate long-term memory for object  
767 recognition, the NORT was carried out in the OFT apparatus, 24 hours after its OFT2  
768 session<sup>4</sup>. In the training session, mice were exposed to two identical objects, called  
769 familiar objects (FO1 and FO2), for which similar exploratory activity was expected<sup>15</sup>,  
770 since they were both novel. The test session was carried out 24 hours later when mice  
771 were exposed to a new object (NO) and to one of the previously exposed familiar  
772 objects (FO1 or FO2). Memory expression is indicated by the tendency of the animal  
773 to spend more time exploring the NO rather than the FO<sup>4,15</sup>. Animals were individually  
774 placed in the periphery of the box with the objects in a session for 10 minutes.  
775 Exploration was recorded only when the animals touched the objects, located in  
776 opposite and symmetrical corners of the box, with their nose or mouth. The time of  
777 exploration of each object was recorded, and its percentage of the time of exploration  
778 of both objects was calculated. The object recognition index is calculated as the  
779 percentage of time spent on each object (referred to the total time spent on both  
780 objects). The difference between the time spent with the NO and the FO is expressed  
781 as a delta value obtained with the subtraction of the indexes of each object.

782  
783 *Light/Dark Task.* The light/dark task was carried out as described by Almeida *et al.*<sup>16</sup>  
784 with minor modifications to evaluate the anxiety behavior-like phenotype<sup>17</sup>. The  
785 apparatus was a rectangular acrylic box (50 × 30 × 30 cm, height × length × width) with  
786 two sides colored white and black, separated by a wall (5×5cm) with an opening at the

787 level of the base of the apparatus joining both sides. A white 100W lamp, placed 60cm  
788 above the center of the apparatus, illuminated the white side of the apparatus, while  
789 the black side was kept closed without illumination. The mice were individually placed  
790 in the light compartment for free exploration of the apparatus for 5 minutes. The  
791 following behavioral parameters were analyzed: the time spent in the light  
792 compartment and the number of transitions between the compartments (light and  
793 dark).

794

795 **Statistical analysis.** All statistical analyses were performed using a statistical software  
796 package (Prism 5.0, GraphPad). The data were extracted from the AnyMaze®  
797 software. To analyse OFT and Light / Dark task, we used the absolute data. The time  
798 in each object in NORT was transformed into a percentage, from which the delta was  
799 extracted based on the subtraction: OF1 - OF2 (training session) and NO - FO (test  
800 session). The two-way ANOVA with Bonferroni correct were used to analyse OFT. The  
801 Student t-test with Mann-Whitney correction were used for to analyse the groups in  
802 NORT, light-dark task and immune response. Data are presented as mean  $\pm$  standard  
803 error.  $P < 0.05$  was considered statistically significant.

804

## 805 REFERENCES

806

- 807 1. Franke-Fayard B, Trueman H, Ramesar J, Mendoza J, Van der Keur M, Van  
808 der Linden R et al. A *Plasmodium berghei* reference line that constitutively  
809 expresses GFP at a high level throughout the complete life cycle. *Mol Biochem*  
810 *Parasitol.* 2004;137(1):23-33.
- 811 2. Potter S, Chan-Ling T, Ball HJ, Mansour H, Mitchell A, Maluish L et al. Perforin  
812 mediated apoptosis of cerebral microvascular endothelial cells during  
813 experimental cerebral malaria. *Int J Parasitol.* 2006;36(4):485–96.
- 814 3. Reis PA, Comim CM, Hermani F, Silva B, Barichello T, Portella AC et al.  
815 Cognitive dysfunction is sustained after rescue therapy in experimental cerebral  
816 malaria, and is reduced by additive antioxidant therapy. *PloS Pathog.*  
817 2010;6(6):e1000963.
- 818 4. de Sousa LP, Almeida RF, Ribeiro-Gomes FL, Carvalho LJM, Souza TM, Souza  
819 DOG & Daniel-Ribeiro CT. Long-term effect of uncomplicated *Plasmodium*  
820 *berghei* ANKA malaria on memory and anxiety-like behaviour in C57BL/6 mice.  
821 *Parasit Vectors.* 2018;11(1):191.
- 822 5. Lavigne MV, Castro M, Mateo N, Deluchi S, Atzori C, Piudo L et al. Whole-cell  
823 *Bordetella pertussis* vaccine component modulates the mouse immune  
824 response to an unrelated soluble antigen. *Microbes Infect.* 2002;4(8):815-820.
- 825 6. Castilho SF, Chovel ML, Hernández NG, González LC, Blanco A, Hernández  
826 DS et al. A *Bordetella pertussis* proteoliposome induces protection in mice  
827 without affecting the immunogenicity of diphtheria and tetanus toxoids in a  
828 trivalent formulation. *Clin Exp Vaccine Res.* 2016; 5(2):175-178.
- 829 7. Goodier MR, Rodriguez-Galan A, Lusa C, Nielsen CM, Darboe A, Moldoveanu  
830 AL et al. Influenza Vaccination Generates Cytokine-Induced Memory-like NK  
831 Cells: Impact of Human Cytomegalovirus Infection. *J Immunol.*  
832 2016;197(1):313-325.

- 833 8. Zhu W, Li S, Wang C, Yu G, Prausnitz MR, Wang BZ. Enhanced immune  
834 responses conferring cross-protection by skin vaccination with a tri-component  
835 influenza vaccine using a microneedle patch. *Front Immunol.* 2018;9:1705.
- 836 9. Oeuvray C, Bouharoun-Tayoun H, Grass-Masse H, Lepers JP, Ralamboranto L,  
837 Tartar A et al. A novel merozoite surface antigen of *Plasmodium falciparum*  
838 (MSP-3) identified by cellular-antibody cooperative mechanism antigenicity and  
839 biological activity of antibodies. *Mem Inst Oswaldo Cruz.* 1994;89(2):77-80.
- 840 10. Daher LJ, Demanga CG, Prieur E, Pérignon JL, Bouharoun-Tayoun H, Druilhe  
841 P. Toward the rational design of a malaria vaccine construct using the MSP3  
842 family as an example: contribution of immunogenicity studies in models. *Infect*  
843 *Immun.* 2010;78(1):477-485.
- 844 11. Lima MCR, Prouvost-Danon A, Patricia MR, Chagas MS, Calheiros AS,  
845 Cordeiro RS et al. Studies on the mechanisms involved in antigen-evoked  
846 pleural inflammation in rats: contribution of IgE and complement. *J Leukoc Biol.*  
847 1997;61(3):286-292.
- 848 12. Couch Y, Trofimov A, Markova N, Nikolenko V, Steinbusch HW, Chekhonin V  
849 et al. Low-dose lipopolysaccharide (LPS) inhibits aggressive and augments  
850 depressive behaviours in a chronic mild stress model in mice. *J*  
851 *Neuroinflammation.* 2016;13(1):108.
- 852 13. Matos DCS, Marcovistz R, Cabello PH, Georgini AR, Sakauchi D, Silva LL.  
853 Immunogenicity Test of Tetanus Component in Adsorbed Vaccines by Toxin  
854 Binding Inhibition Test. *Mem Inst Oswaldo Cruz.* 2002;97(6):909-913.
- 855 14. Almeida RF, Ganzella M, Machado DG, Loureiro SO, Leffa D, Quiconzes  
856 Santos A, et al. Olfactory bulbectomy in mice triggers transient and longlasting  
857 behavioural impairments and biochemical hippocampal disturbances. *Prog*  
858 *Neuropsychopharmacol Biol Psychiatry.* 2017;76:1-11.
- 859 15. Leger M, Quiedeville A, Bouet V, Haelewyn B, Boulouard M, Schumann-Bard P  
860 et al. Object recognition test in mice. *Nat Protoc.* 2013; 8(12):2531-2537.
- 861 16. Almeida RF, Comasseto DD, Ramos DB, Hansel G, Zimmer ER, Loureiro SO,  
862 et al. Guanosine anxiolytic-like effect involves adenosinergic and glutamatergic  
863 neurotransmitter systems. *Mol Neurobiol.* 2017;54(1):423-436.
- 864 17. Griebel G, Holmes A. 50 years of hurdles and hope in anxiolytic drug discovery.  
865 *Nat Rev Drug Discov.* 2013;12(9):667-687.

866  
867  
868

869 **FIGURES, TABLE AND LEGENDS**

870

871 **Fig. 1**

872

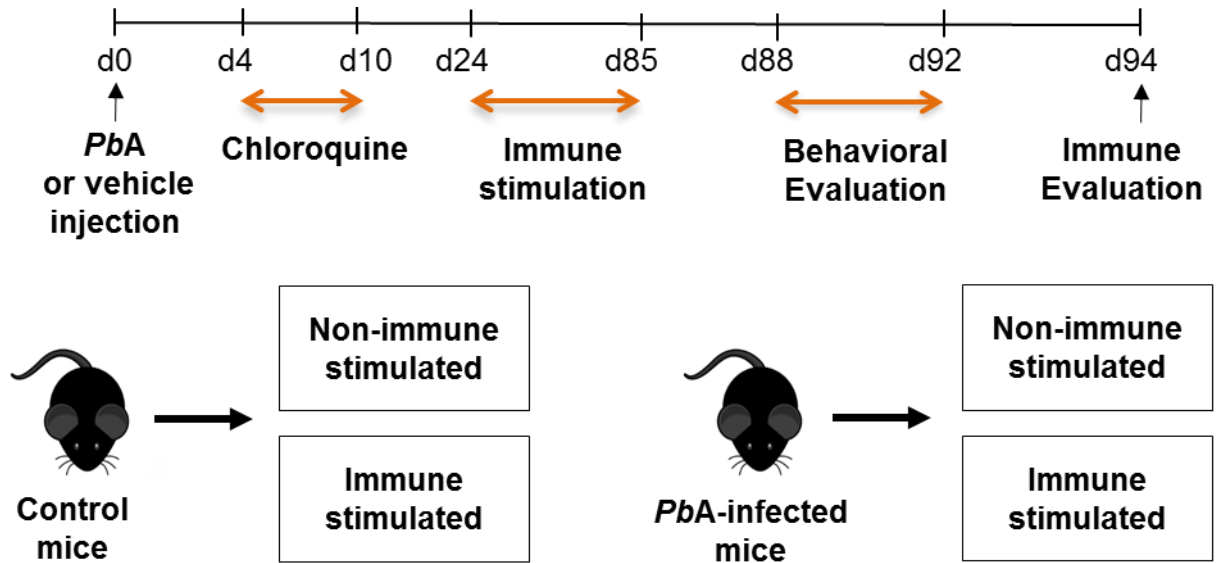

873

874

875

876

877

878

879

880

881

882

**Fig. 1.** Groups of mice were infected or not with *Plasmodium berghei* ANKA (*PbA*) and treated with chloroquine (25 mg / kg) for seven days via gavage from the fourth day post-infection. After 14 days, the animals were subdivided into groups of mice immune stimulated with different immunization strategies or non-immune stimulated. Subsequently, mice were evaluated in behavioural tasks for locomotivity, memory and anxiety phenotype. The immune response of mice randomly chosen was evaluated.

883 **Fig. 2**  
884

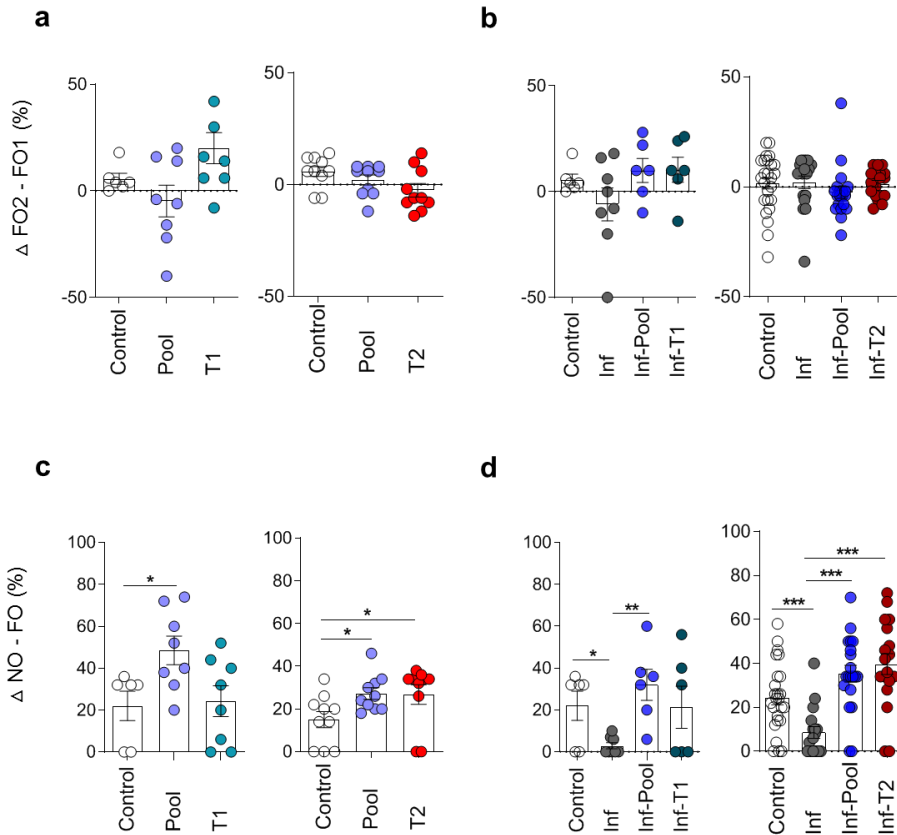

885  
886  
887  
888  
889  
890  
891  
892  
893  
894  
895  
896  
897  
898  
899  
900  
901  
902  
903  
904  
905  
906  
907  
908  
909

**Fig. 2. Immune stimulation improves long-term memory performance in healthy and *PbA*-infected mice.** Healthy or *PbA*-infected (and treated) mice were immune stimulated, or not, with the Pool, T1 or T2 strategies. Behavioural tasks were performed from day 88 to 92 post-infection (77 to 81 days after CQ treatment). During the training session of the New Object Recognition Task (NORT), all experimental groups explored the two objects, called familiar objects (FO1 and FO2, **a**, **b**) for the same length of time. In the test session, a new object (NO) is introduced in the task (**c**, **d**). Immune stimulation of healthy mice with Pool and T2 strategies (Pool and T2 groups) improved the exploratory time spent in the NO in relation to the Control group (**c**). *PbA*-infected mice (Inf group) presented similar exploration of NO and FO, showing a memory deficit, which was reversed after immune stimulation with Pool and T2 strategies (Pool and T2 groups) (**d**). Experimental groups: Control (non-infected / non-immune stimulated mice, n = 6 - 25); Pool (non-infected / Pool-immune stimulated mice, n = 8 - 10); T1 (non-infected / T1-immune stimulated mice, n = 8); T2 (non-infected / T2-immune stimulated mice, n = 10); Inf (infected / non-immune stimulated mice, n = 6 - 17); Inf-Pool (infected / Pool-immune stimulated mice, n = 6 - 20); Inf-T1 (infected / T1-immune stimulated mice, n = 6); Inf-T2 (infected / T2-immune stimulated mice, n = 8 - 18). Data are expressed as mean and s.e.m. \*\*\*P < 0.001; \*\*P < 0.01; \*P < 0.05; Mann-Whitney Unpaired t-test was used. Data shown represent one of two to five independent experiments (Control, Pool, T1, T2, Inf, Inf-Pool, Inf-T1); and a pool of two independent experiments (Control, Inf, Inf-Pool, Inf-T2).

910 **Fig. 3**  
911

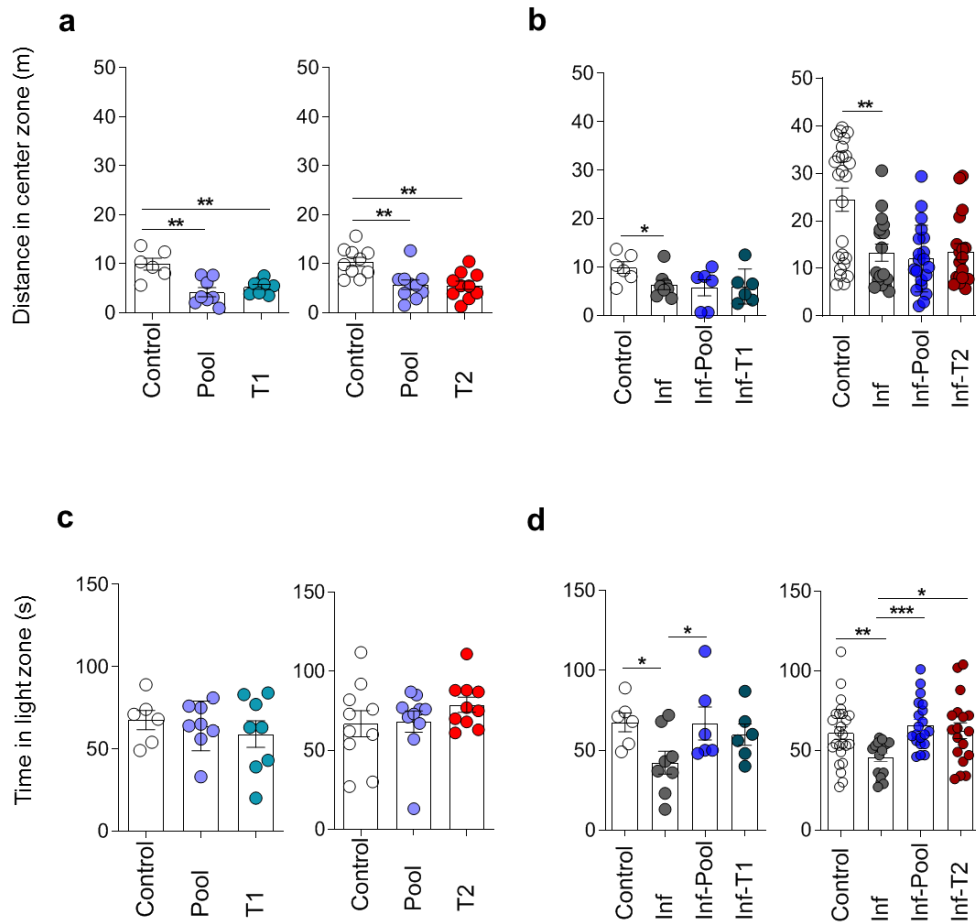

912  
913

914 **Fig. 3. Immune stimulation attenuates the anxiety-like behaviour observed in**  
915 ***PbA*-infected mice.** Healthy or *PbA*-infected (and treated) mice were immune  
916 stimulated, or not, with the Pool, T1 or T2 strategies. Behavioural tasks were performed  
917 from day 88 to 92 post-infection (77 to 81 days after CQ treatment). During the training  
918 session of the Open Field Task (OFT), Pool, T1 and T2 immune stimulated groups (a)  
919 and *PbA*-infected animals (Inf group) (b) showed a decrease in the distance travelled  
920 in the centre of the arena, as compared to the Control group. No difference was  
921 observed between the performance of Pool, T1, T2 and Control groups in the Light /  
922 Dark task (c). *PbA*-infected mice (Inf group) spent less time in the light zone of the  
923 Light / Dark apparatus. This anxiety-like behaviour was suppressed following immune  
924 stimulation with the Pool and T2 immune strategies (d). Experimental groups: Control  
925 (non-infected / non-immune stimulated mice, n = 6 - 25); Pool (non-infected / Pool-  
926 immune stimulated mice, n = 8 - 10); T1 (non-infected / T1-immune stimulated mice, n  
927 = 8); T2 (non-infected / T2-immune stimulated mice, n = 10); Inf (infected / non-immune  
928 stimulated mice, n = 6 - 17); Inf-Pool (infected / Pool-immune stimulated mice, n = 6 -  
929 20); Inf-T1 (infected / T1-immune stimulated mice, n = 6); Inf-T2 (infected / T2-immune  
930 stimulated mice, n = 8 - 18). Data are expressed as mean and s.e.m. \*\*\*P < 0.001; \*\*P  
931 < 0.01; \*P < 0.05; Mann-Whitney Unpaired t-test was used. Data shown represent one  
932 of two to five independent experiments (Control, Pool, T1, T2, Inf, Inf-Pool, Inf-T1); and  
933 a pool of two independent experiments (Control, Inf, Inf-Pool, Inf-T2).

934 **Extended data, Fig. 1**  
 935

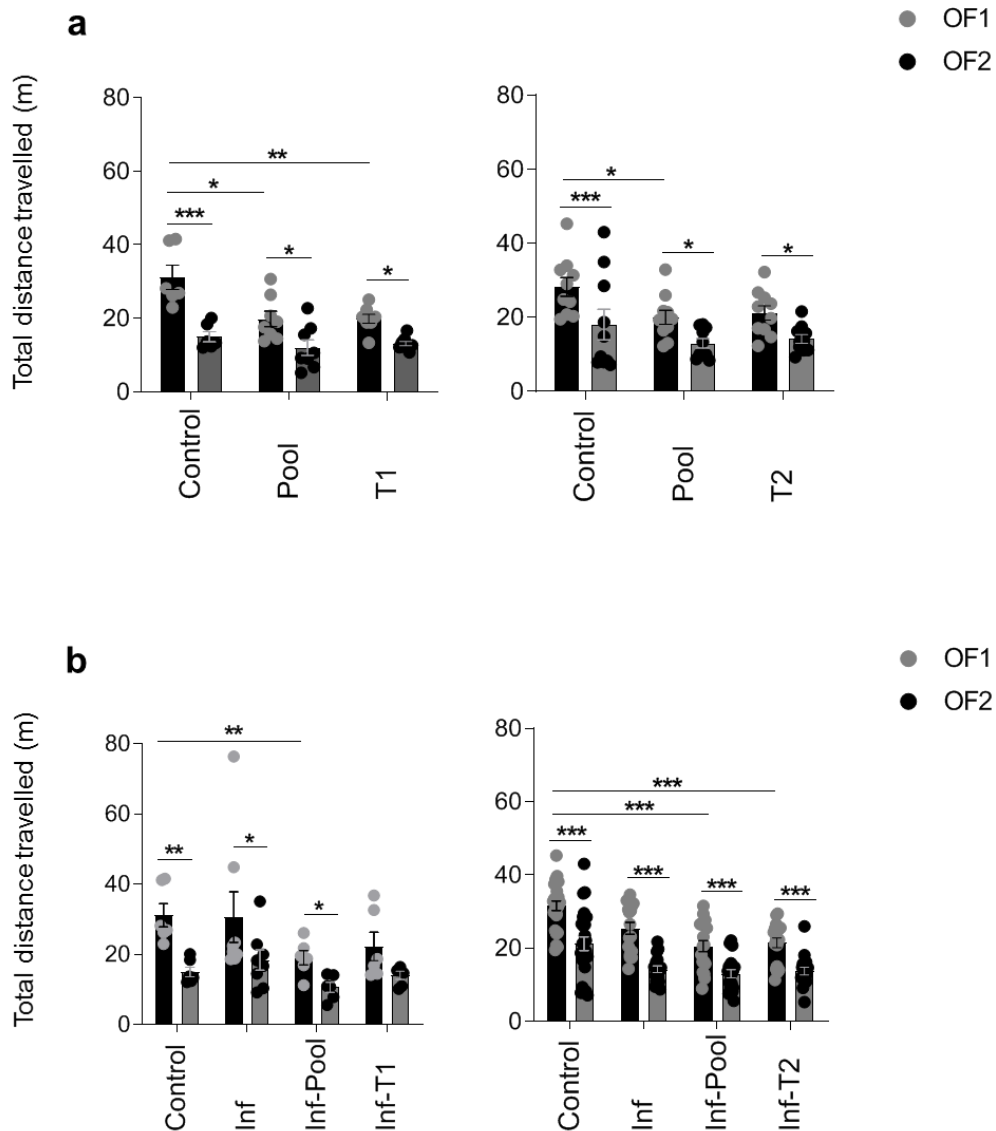

936  
 937  
 938  
 939  
 940  
 941  
 942  
 943  
 944  
 945  
 946  
 947  
 948  
 949  
 950  
 951  
 952

**Extended data, Fig. 1. Immune stimulation and *PbA* infection do not influence habituation memory in mice.** Healthy or *PbA*-infected (and treated) mice were immune stimulated, or not, with the Pool, T1 or T2 strategies. Behavioural tasks were performed from day 88 to 92 post-infection (77 to 81 days after CQ treatment). Total distance travelled in the Open Field Task (OFT) during the training (OF1) and test session (OF2) in healthy and infected mice (**a, b**) were evaluated. OFT: healthy mice groups (Control, n = 6; Pool, n = 8; T1, n = 8 and Control, n = 10; Pool, n = 10; T2, n = 10) and infected mice groups (Control, n = 6; Inf, n = 8; Inf-Pool, n = 6; Inf-T1, n = 6 and Control, n = 25; Inf, n = 17; Inf-Pool, n = 20; Inf-T2, n = 18). Data shown represent one of two to five independent experiments (Control, Pool, T1, T2, Inf, Inf-Pool, Inf-T1); and a pool of two independent experiments (Control, Inf, Inf-Pool, Inf-T2).

953 **Extended data, Fig. 2**  
954

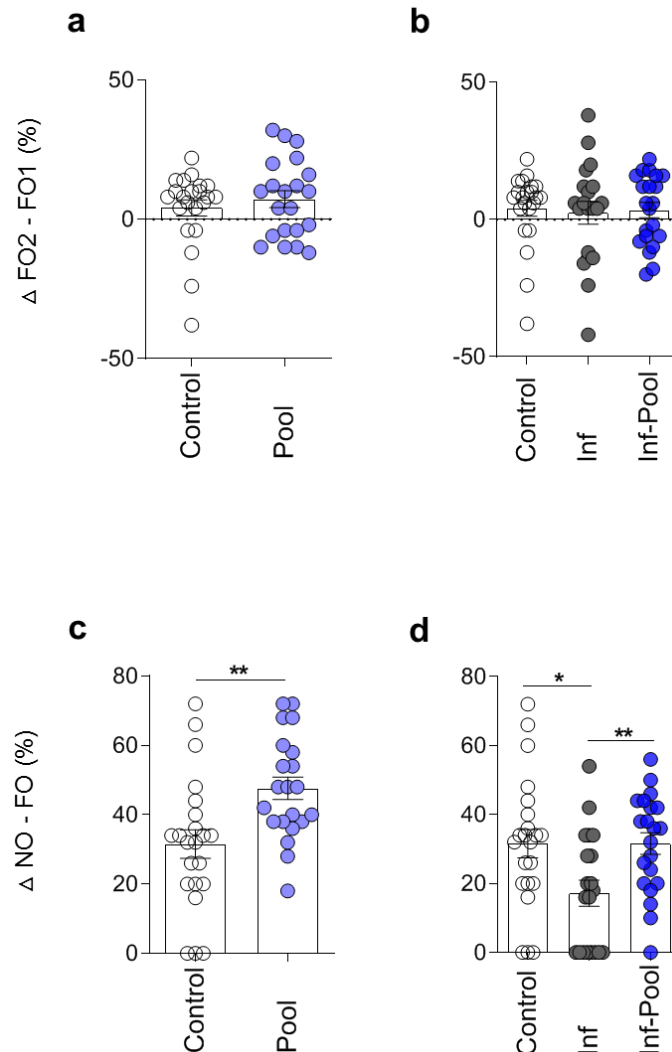

955  
956  
957

958 **Extended data, Fig. 2. Immune stimulation improves long-term memory**  
959 **performance in healthy and *PbA*-infected mice.** Healthy or *PbA*-infected (and  
960 treated) mice were immune stimulated, or not, with the Pool strategy. Behavioural tasks  
961 were performed from day 88 to 92 post-infection (77 to 81 days after CQ treatment).  
962 The exploration of the two familiar objects (FO1 and FO2), during the training session  
963 of NORT (a, b), and of the FO and the novel object (NO), during the test session (c,  
964 d), were explored and are expressed as differences in percentage of the exploration  
965 time. All groups of mice explored similarly the FO1 and FO2 during the training session  
966 (a, b). Immune stimulation of healthy mice with Pool strategy (Pool group) improved  
967 the exploratory time spent on the NO in relation to the FO, as compared to the Control  
968 group (c). Pool-immune stimulation of *PbA*-infected mice (Inf-Pool group) reversed the  
969 memory deficit of *PbA*-infected mice (Inf group) (d). NORT: healthy mice group  
970 (Control, n = 22; Pool, n = 21) and infected mice group (Control, n = 22; Inf, n = 20; Inf-  
971 Pool, n = 21). Data shown represent a pool of two independent experiments. Data are  
972 expressed as mean and s.e.m. \*\*\* $P < 0.001$ ; \*\* $P < 0.01$ ; \* $P < 0.05$ ; Two-way ANOVA  
973 (a, b) and Unpaired t-test (c, d, e, f) was used.



974 **Extended data, Fig. 3**  
975

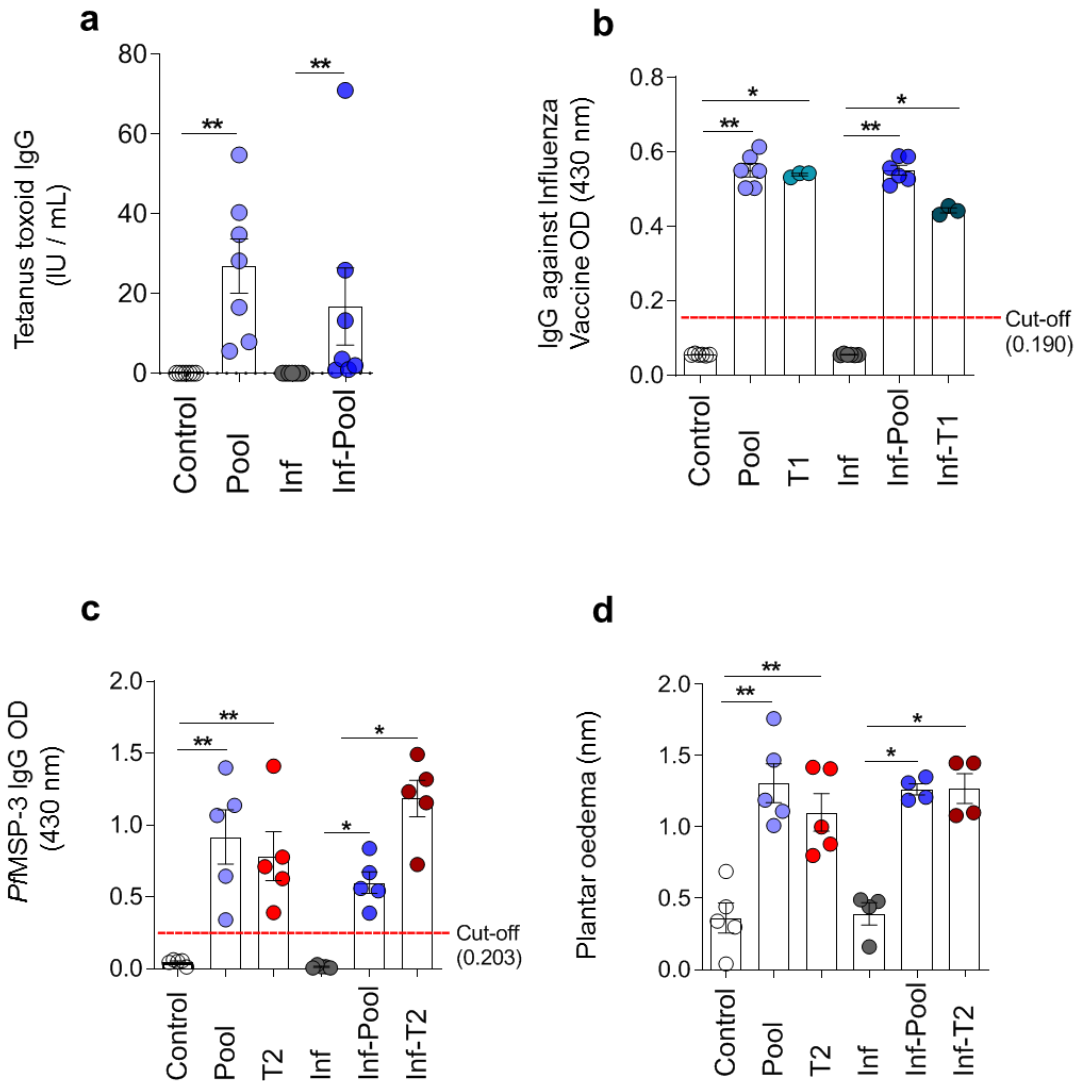

976  
977

978 **Extended data, Fig. 3. Immune stimulation with dT and influenza vaccines, PFMSP-3 and OVA proteins triggers specific immune responses.** Healthy or *PbA*-  
979 infected (and treated) mice were immune stimulated, or not, with the strategies: Pool,  
980 T1 or T2. After behavioural evaluation, mice were randomly chosen for the analysis of  
981 the effectiveness of immune stimulation. Serum levels of (a) dT-specific IgG (n = 7),  
982 (b) Influenza-specific IgG (n = 3 - 6), and (c) PFMSP-3-specific IgG (n = 5) were  
983 measured. e, Reaction to OVA was elicited by intradermal injection of the antigen in  
984 the footpad of the OVA-sensitized mice. Oedema was determined by measuring the  
985 thickness of the paw before and after inoculation (n = 4 - 5). Experimental groups:  
986 Control (non-infected / non-immune stimulated); Pool (non-infected / Pool-immune  
987 stimulated); T1 (non-infected / T1-immune stimulated); T2 (non-infected / T2-immune  
988 stimulated); Inf (infected / non-immune stimulated); Inf-Pool (infected / Pool-immune  
989 stimulated); Inf-T1 (infected / T1-immune stimulated); Inf-T2 (infected / T2-immune  
990 stimulated). Data are expressed as mean and s.e.m. \*\**P* < 0.01; \**P* < 0.05; Unpaired  
991 t-test with Mann-Whitney test was used.  
992  
993

994 **Extended data, Fig. 4**

995

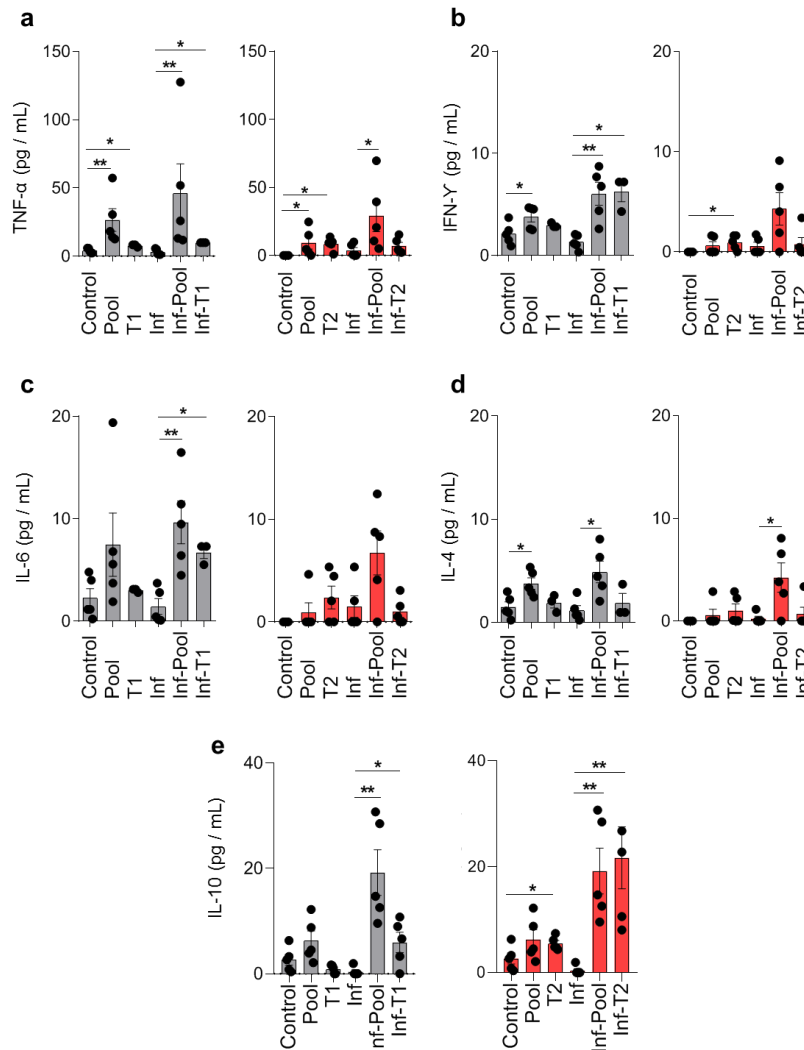

996

997

998

999

1000

1001

1002

1003

1004

1005

1006

1007

1008

1009

1010

1011

1012

1013

**Extended data, Fig. 4. Immune stimulation with the different strategies elicits cellular responses measured by increased serum cytokine levels.** Healthy or infected (and treated) mice were immune stimulated, or not, with the strategies: Pool, T1 or T2. Serum samples were collected after the behavioural evaluation (84 days after the end of CQ treatment), and levels of the cytokines **(a)** TNF $\alpha$ , **(b)** IFN $\gamma$ , **(c)** IL-6, **(d)** IL-4 and **(e)** IL-10 were quantified by flow cytometry using cytometric bead array. Experimental groups: Control (non-infected / non-immune stimulated, n = 3 - 5); Pool (non-infected / Pool-immune stimulated, n = 5); T1 (non-infected / T1-immune stimulated, n = 3); T2 (non-infected / T2-immune stimulated, n = 5); Inf (infected / non-immune stimulated, n = 5); Inf-Pool (infected / Pool-immune stimulated, n = 5); Inf-T1 (infected / T1-immune stimulated, n = 3); Inf-T2 (infected / T2-immune stimulated, n = 5). Data are representative of three (Control, Pool, Inf and Inf-Pool groups) and one (T1, T2, Inf-T1 and Inf-T2 groups) independent experiments. Data are expressed as mean and s.e.m. \*\* $P < 0.01$ ; \* $P < 0.05$ ; Unpaired t-test with Mann-Whitney test was used.

1014 **Extended data, Fig. 5**  
1015

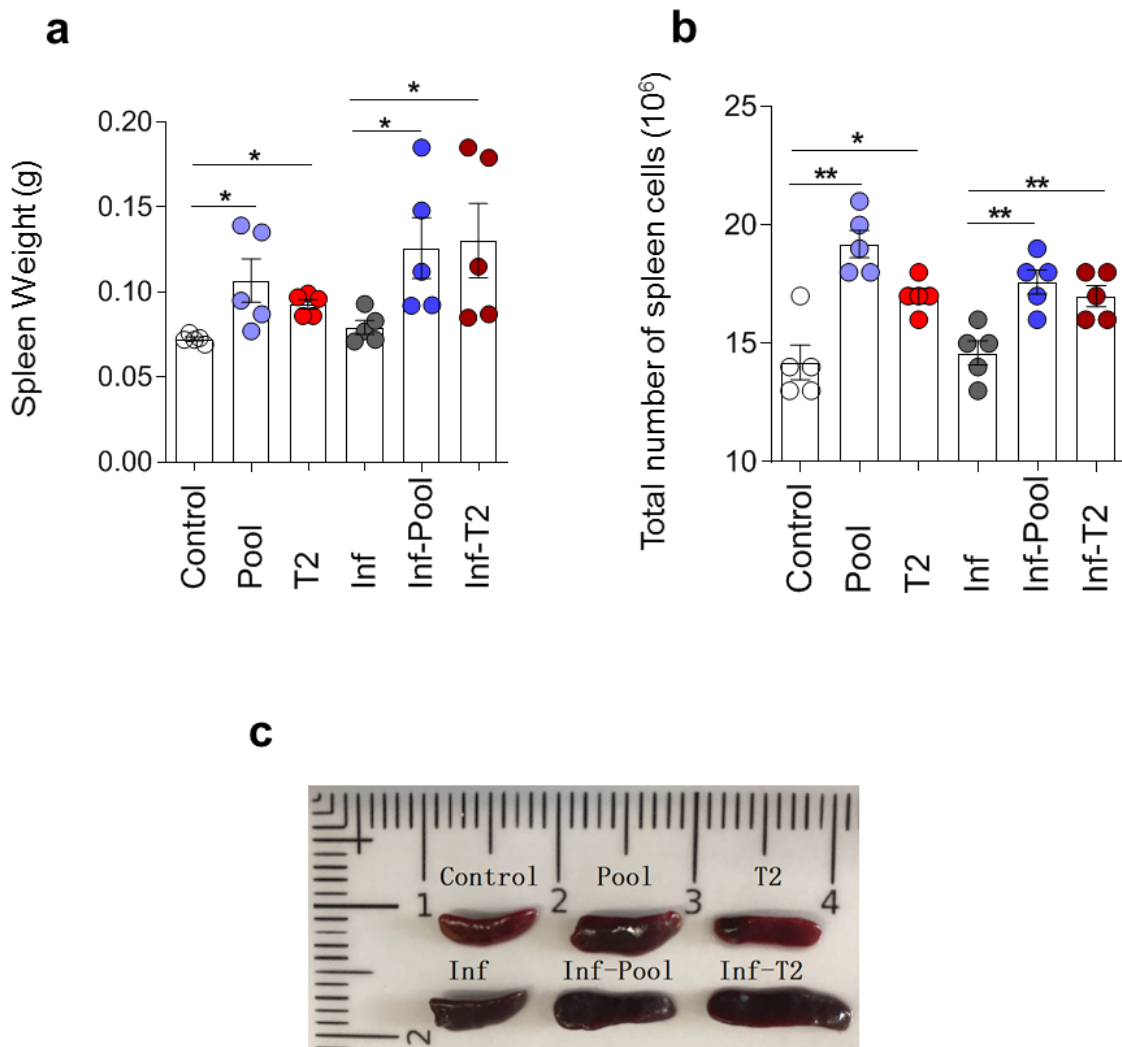

1016  
1017  
1018  
1019  
1020  
1021  
1022  
1023  
1024  
1025  
1026  
1027  
1028  
1029  
1030  
1031

**Extended data, Fig. 5. Splenic enlargement is observed after immune stimulation.** Healthy or infected (and treated) mice were immune stimulated, or not, with the Pool or T2 strategy. Spleen weight (**a**) and total number of splenocytes (**b**) were evaluated at the end of the cognitive behavioural tasks ( $n = 5$ ) (84 days after the end of CQ treatment). **c**, Representative photograph of Control, Pool, T2, Inf, Inf-Pool and Inf-T2 groups. Groups of infected mice showed a dark colour attributed to hemozoin, even more than two and a half months after infection. Experimental groups: Control (non-infected / non-immune stimulated); Pool (non-infected / Pool-immune stimulated); T2 (non-infected / T2-immune stimulated); Inf (infected / non-immune stimulated); Inf-Pool (infected / Pool-immune stimulated); Inf-T2 (infected / T2-immune stimulated). Data are mean and s.e.m.  $**P < 0.01$ ;  $*P < 0.05$ ; Unpaired t-test with Mann-Whitney test was used.

1032 **Extended data, Fig. 6**

1033

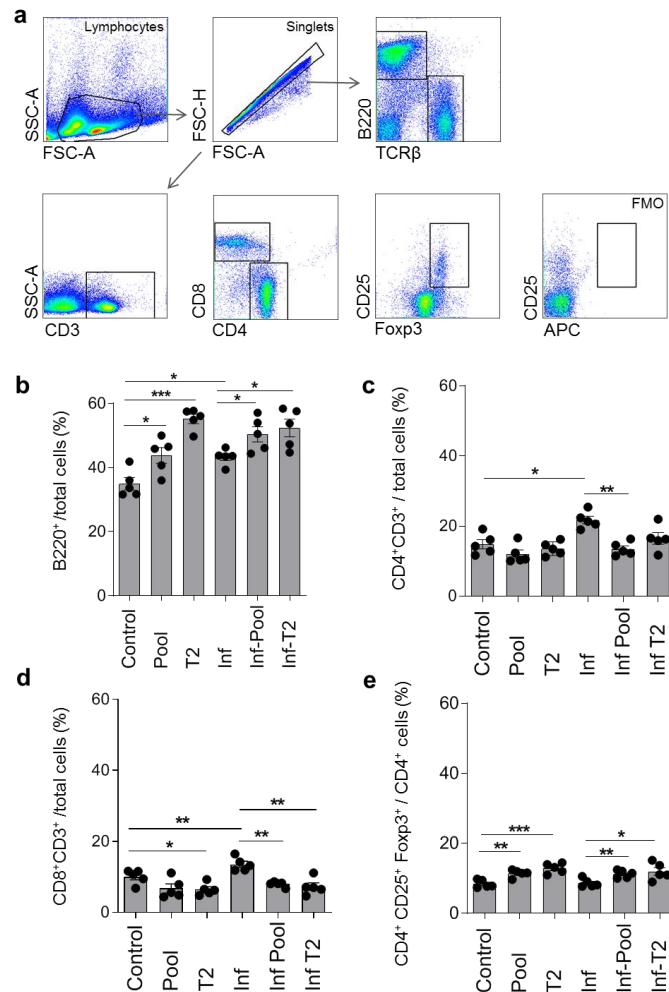

1034

1035

1036

1037 **Extended data, Fig. 6. Stimulation of the immune system by the Pool and T2**

1038 **strategies induces differentiation of Treg cells among the CD4 T cell population.**

1039 Healthy or infected (and treated) mice were immune stimulated, or not, with the Pool

1040 or T2 strategy. Splenic lymphocytes subpopulations were analysed at the end of the

1041 cognitive behavioural tasks (84 days after the end of CQ treatment), when five mice

1042 were randomly chosen per group. **a**, Representative gating strategy to identify the

1043 populations of B cells (B220<sup>+</sup>), CD4 T cells (CD3<sup>+</sup>CD4<sup>+</sup>), CD8 T cells (CD3<sup>+</sup>CD8<sup>+</sup>) and

1044 Treg cells (CD3<sup>+</sup>CD4<sup>+</sup>CD25<sup>+</sup>Foxp3<sup>+</sup>) by flow cytometry. Percentage of B cells (**b**), CD4

1045 T cells (**c**) and CD8 T cells (**d**) per spleen. **e**, Percentage of Treg cells among the CD4

1046 T cells population. Experimental groups: Control (non-infected / non-immune

1047 stimulated); Pool (non-infected / Pool-immune stimulated); T2 (non-infected / T2-

1048 immune stimulated); Inf (infected / non-immune stimulated); Inf-Pool (infected / Pool-

1049 immune stimulated); Inf-T2 (infected / T2-immune stimulated). Data are expressed as

1050 mean and s.e.m. \*\*P < 0.01; \*P < 0.05; Unpaired t-test with Mann-Whitney test was

1051 used.

1052 **Extended data, Fig. 7**  
1053

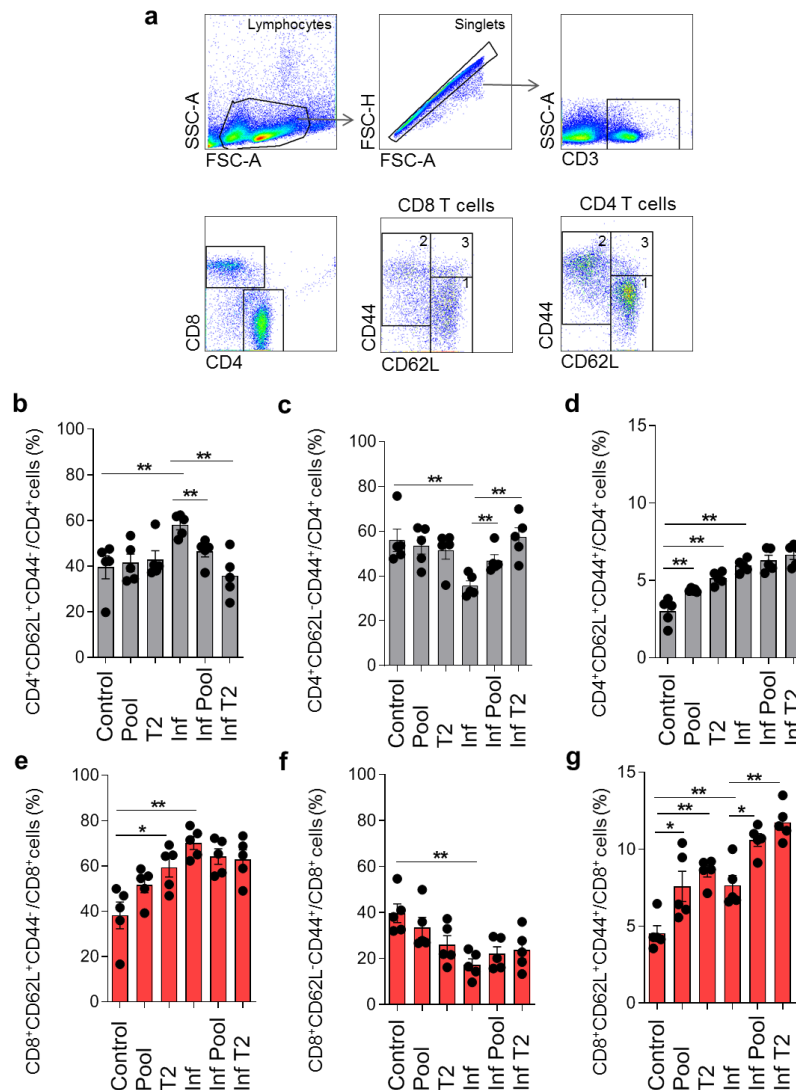

1054  
1055  
1056  
1057  
1058  
1059  
1060  
1061  
1062  
1063  
1064  
1065  
1066  
1067  
1068  
1069  
1070  
1071

**Extended data, Fig. 7. Effect of immune stimulation with the Pool and T2 strategies on the activation and memory phenotypes of CD4 and CD8 T cells.** Healthy or infected (and treated) mice were immune stimulated, or not, with Pool or T2 strategy. Splenic lymphocyte subpopulations were analysed at the end of the cognitive behavioural tasks (84 days after the end of CQ treatment), when five mice were randomly chosen per group. **a**, Representative gating strategy to identify the subpopulations of naïve (gate: 1; CD44<sup>-</sup>CD62L<sup>+</sup>); effector / effector memory (gate: 2; CD44<sup>+</sup>CD62L<sup>-</sup>) and central memory (gate: 3; CD44<sup>+</sup>CD62L<sup>+</sup>) CD4 and CD8 T cells by flow cytometry. Percentage of naïve, effector / effector memory and central memory CD4 T cells (**b-d**) and CD8 T cells (**e-g**). Experimental groups: Control (non-infected / non-immune stimulated); Pool (non-infected / Pool-immune stimulated); T2 (non-infected / T2-immune stimulated); Inf (infected / non-immune stimulated); Inf-Pool (infected / Pool-immune stimulated); Inf-T2 (infected / T2-immune stimulated). Data are mean and s.e.m. \*\**P* < 0.01; \**P* < 0.05; Unpaired t-test with Mann-Whitney test was used.

1072 **Fig. 1 Material & Methods**

1073

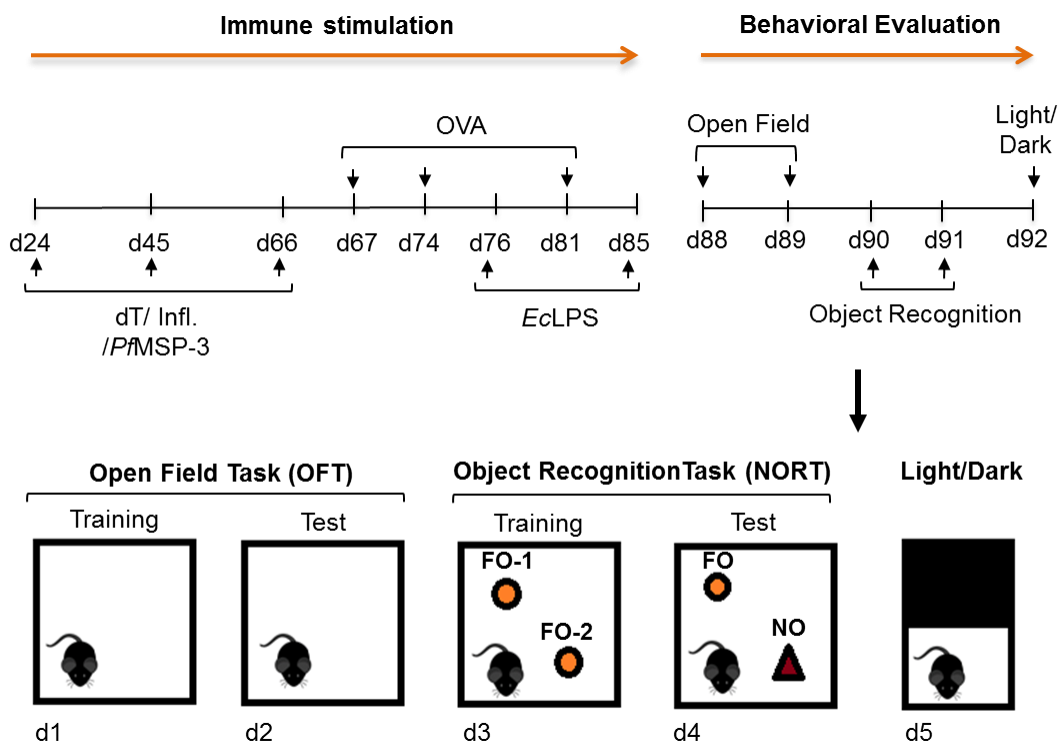

1074

1075

1076

1077

1078

1079

1080

1081

1082

1083

1084

1085

1086

1087

1088

1089

1090

1091

1092

1093

1094

1095

1096

1097

**Fig. 1 Material & Methods. Flow chart of immune stimuli and behavioural assessment.** Mice (infected or not with *PbA* and treated with CQ) were immune stimulated or non-immune stimulated, according to the composition of the immunization (Pool, T1 and T2) strategies used. Three doses of the dT and Influenza vaccines and the *PfMSP-3* recombinant protein were inoculated conjointly, in different pathways, with a twenty-day interval between inoculations. Three doses of OVA, with a six-day interval between each one, were inoculated one day after the third dose of dT and Influenza vaccines and *PfMSP-3* protein. The first injection of *EcLPS* was done two days after the second dose of OVA, being the second of two injections administered nine days after the first one. Assessment of performance on behavioural tasks started 88 to 92 days post infection (77 to 81 days after the complete parasitological cure of animals obtained with CQ treatment). The beginning of behavioural tests corresponded to 22 days after the last stimulation with the vaccines (Tetanus-Diphtheria and Influenza) and the *PfMSP-3* recombinant protein; 7 days after the latter injection of Ovalbumin; and 3 days after the LPS final inoculation. The open field was performed to measure locomotivity, spatial habituation memory and anxiety phenotype, in two sessions [training (OF1) and test (OF2)]. Thereafter, the new object recognition task (NORT) was performed to measure long-term recognition memory, also in two sessions at consecutive days (training and testing). Finally, the anxious behaviour phenotype was specifically evaluated, by the light-dark test, in a unique session.

1098 **Table 1.** Immune stimulus inoculation strategy: route, region, concentration, volume  
1099 and number of injections of immunogens.  
1100

| Immune Stimuli    | Route                           | Region              | Concentration  | Volume | Inoculation        |
|-------------------|---------------------------------|---------------------|----------------|--------|--------------------|
| dT vaccine        | Subcutaneous                    | Back                | 1/5 human dose | 100 µl | 3                  |
| Influenza vaccine | Intramuscular                   | Quadriceps          | 1/5 human dose | 100 µl | 3                  |
| pfMSP-3           | Subcutaneous                    | Base Tail           | 10 µg          | 100 µl | 3                  |
| ecLPS             | Intraperitoneal                 | Abdomen             | 0,1 mg/kg      | 100 µl | 2                  |
| Ovalbumin         | Subcutaneous<br>Intraperitoneal | Back and<br>Abdomen | 50 µg          | 200 µl | 1 s.b.c.<br>2 i.p. |

1101

1102 s.b.s: subcutaneous

1103 i.p.: intraperitoneal
